# Supplementary material for: Bibliometric Analysis of Literature on Acute Respiratory Distress Syndrome Treatments Published Between 2000 and 2019
Source: Research Square preprint supplement (doi:10.21203/rs.3.rs-128479/v1), 2020-12-22
Supplement: Supplementary file 1 [file 1422f287dbac36d79e652559.docx]

**Bibliometric analysis of literature on acute respiratory distress syndrome treatments published between 2000 and 2019**

Zong-Yu Wang, Zhi-Chao Zhou, Jie Zheng, Xi Zhu

Zong-Yu Wang and Zhi-Chao Zhou are co-first authors.

Corresponding author: Xi Zhu

**Online supplement 1**

**Detailed description of literature retrieval strategy**

**Search procedure in PubMed**

We searched the PubMed database with acute respiratory distress syndrome (ARDS) as a medical subject heading (MeSH). A total of 6,814 papers (unique PubMed identifiers, PMIDs) were retrieved. The retrieval process was as follows:

| Search | Query | Results |
| --- | --- | --- |
| #1 | Search ("Respiratory Distress Syndrome, Adult/diet therapy"[Mesh] OR "Respiratory Distress Syndrome, Adult/drug therapy"[Mesh] OR "Respiratory Distress Syndrome, Adult/nursing"[Mesh] OR "Respiratory Distress Syndrome, Adult/prevention and control"[Mesh] OR "Respiratory Distress Syndrome, Adult/surgery"[Mesh] OR "Respiratory Distress Syndrome, Adult/therapy"[Mesh]) | 9,777 |
| #2 | Search ("2000/01/01"[Date - Publication]: "2019/12/31"[Date - Publication]) AND #1 | 6,814 |

A total of 6,814 PMIDs were extracted from the search results.

**Search procedure in Web of Science**

We searched the Web of Science database with as many keywords as possible related to ARDS treatment. The literature retrieved from PubMed and Web of Science was then merged, for a total of 13,933 articles, all of which were used in the analysis. Publication time was limited to the period 2000–2019.

| Search | Query | Results |
| --- | --- | --- |
| #1 | PMID=(32029046 OR 31967232 OR 31967231 OR 31967224 OR 31967222 OR 31928044 OR 31928043 OR …… )  Indexes=SCI-EXPANDED, SSCI | 5,595 |
| # 2 | TS=("adult respiratory distress syndrome" OR "acute respiratory distress syndrome" OR ARDS OR "acute lung injury")  Indexes=SCI-EXPANDED, SSCI Timespan=2000-2019 | 30,445 |
| # 3 | TS=("extracorporeal life support" OR ECLS OR "extracorporeal carbon dioxide removal" OR ECCO2R OR "patient-self inflicted lung injury" OR "transpulmonary pressure" OR "mechanical power" OR "mechanical ventilation" OR "protective ventilation" OR "positive end-expiratory pressure" OR PEEP OR "positive end-expiratory pressure titration" OR "low tidal volume" OR "tidal volume" OR "permissive hypercapnia" OR "pressure support ventilation" OR "airway pressure release ventilation" OR "spontaneous breathing" OR "noninvasive ventilation" OR "noninvasive mechanical ventilation" OR "noninvasive positive pressure ventilation" OR "prone positioning" OR "prone position" OR "prone ventilation" OR "recruitment maneuver" OR "recruitment maneuvers" OR "lung recruitment" OR "alveolar recruitment" OR "extracorporeal membrane oxygenation" OR ECMO OR "high flow oxygen" OR "high flow nasal" OR "fluid administration" OR "fluid management" OR "fluid therapy" OR "fluid strategy" OR "lung water" OR "high-frequency oscillation" OR sedation OR rehabilitation OR "physical therapy" OR physiotherapy OR "pulmonary rehabilitation" OR "mobilization practices" OR "mobility practices" OR "neuromuscular blocker" OR "neuromuscular blocking agents" OR "neuromuscular blockade corticosteroid" OR glucocorticoid OR steroid OR dexamethasone OR hydrocortisone OR methylprednisolone OR budesonide OR "beta agonist" OR "β2 adrenergic receptor agonist" OR salbutamol OR salmeterol OR aspirin OR heparin OR "tissue factor pathway inhibitor" OR TFPI OR antithrombin OR "protein C" OR statins OR rosuvastatin OR simvastatin OR "omega-3 fatty acid" OR "vitamin D" OR "factor VII" OR sivelestat OR ulinastatin OR granulocyte OR "macrophage colony-stimulating factor" OR "keratinocyte growth factor" OR prostaglandin OR prostacyclin OR ganciclovir OR surfactant OR "nitric oxide" OR pentoxifylline OR lisofylline OR procystein OR albumin OR "stem cell")  Indexes=SCI-EXPANDED, SSCI Timespan=2000-2019 | 1,374,880 |
| # 4 | #3 AND #2  Indexes=SCI-EXPANDED, SSCI Timespan=2000-2019 | 13,992 |
| # 5 | #4 OR #1  Indexes=SCI-EXPANDED, SSCI Timespan=2000-2019 | 16,103 |
| # 6 | (#5) *AND*DOCUMENT TYPES: (Article OR Letter OR Review)  Indexes=SCI-EXPANDED, SSCI Timespan=2000-2019 | 13,933 |

**PMID list extracted from the final search results**

PMID=(32029046 OR 31967232 OR 31967231 OR 31967224 OR 31967222 OR 31928044 OR 31928043 OR 31888896 OR 31884026 OR 31874521 OR 31871954 OR 31847115 OR 31826930 OR 31826269 OR 31824644 OR 31818300 OR 31801451 OR 31795533 OR 31794698 OR 31780614 OR 31778609 OR 31773728 OR 31770398 OR 31766467 OR 31752952 OR 31736005 OR 31724440 OR 31710601 OR 31701794 OR 31701204 OR 31694668 OR 31685356 OR 31684936 OR 31665179 OR 31662961 OR 31650049 OR 31629496 OR 31622273 OR 31620833 OR 31609554 OR 31606045 OR 31602488 OR 31601427 OR 31584399 OR 31575599 OR 31573637 OR 31568012 OR 31567516 OR 31562811 OR 31557974 OR 31553626 OR 31549225 OR 31545246 OR 31539417 OR 31535532 OR 31529353 OR 31521432 OR 31511662 OR 31509438 OR 31503052 OR 31496114 OR 31495868 OR 31488363 OR 31485728 OR 31484242 OR 31481634 OR 31471534 OR 31464267 OR 31452377 OR 31449154 OR 31449151 OR 31449150 OR 31449149 OR 31449148 OR 31449147 OR 31449144 OR 31438948 OR 31421952 OR 31421114 OR 31420682 OR 31419216 OR 31415662 OR 31412784 OR 31411275 OR 31409646 OR 31404589 OR 31401266 OR 31399381 OR 31385880 OR 31378621 OR 31376462 OR 31372630 OR 31365111 OR 31361873 OR 31357202 OR 31356476 OR 31356105 OR 31348289 OR 31347410 OR 31345404 OR 31335733 OR 31335543 OR 31335383 OR 31334568 OR 31320374 OR 31315727 OR 31315725 OR 31315560 OR 31311048 OR 31300012 OR 31295671 OR 31288737 OR 31283531 OR 31278248 OR 31278170 OR 31273573 OR 31272134 OR 31271048 OR 31269867 OR 31267871 OR 31266823 OR 31262413 OR 31260637 OR 31260428 OR 31258917 OR 31253646 OR 31249258 OR 31246744 OR 31235361 OR 31225973 OR 31219247 OR 31214743 OR 31212385 OR 31208770 OR 31200762 OR 31200734 OR 31198159 OR 31198142 OR 31182376 OR 31177198 OR 31168194 OR 31166289 OR 31162204 OR 31162201 OR 31149964 OR 31147412 OR 31144997 OR 31138733 OR 31134957 OR 31124619 OR 31112383 OR 31103803 OR 31102782 OR 31097681 OR 31092491 OR 31090854 OR 31088354 OR 31088096 OR 31084970 OR 31065149 OR 31060095 OR 31060094 OR 31060093 OR 31060092 OR 31060091 OR 31060090 OR 31060089 OR 31060088 OR 31060087 OR 31060086 OR 31060085 OR 31060082 OR 31053084 OR 31034248 OR 31027465 OR 31013737 OR 31002113 OR 30996041 OR 30992308 OR 30990758 OR 30989590 OR 30989295 OR 30985319 OR 30985312 OR 30973702 OR 30966906 OR 30966902 OR 30966900 OR 30961913 OR 30958975 OR 30957682 OR 30955569 OR 30955568 OR 30954692 OR 30940722 OR 30937908 OR 30928674 OR 30927030 OR 30923559 OR 30919408 OR 30908313 OR 30898993 OR 30898468 OR 30898064 OR 30889345 OR 30885316 OR 30883400 OR 30875355 OR 30874823 OR 30872579 OR 30871304 OR 30871301 OR 30864952 OR 30862988 OR 30862672 OR 30857910 OR 30855325 OR 30852002 OR 30850411 OR 30850004 OR 30850002 OR 30844950 OR 30844949 OR 30841904 OR 30841764 OR 30836100 OR 30834946 OR 30831550 OR 30830962 OR 30829223 OR 30827316 OR 30817401 OR 30817387 OR 30808930 OR 30806104 OR 30803350 OR 30791860 OR 30790030 OR 30784605 OR 30779719 OR 30776290 OR 30771687 OR 30770210 OR 30762080 OR 30744629 OR 30744598 OR 30744494 OR 30743151 OR 30739090 OR 30732194 OR 30730443 OR 30730199 OR 30727998 OR 30724098 OR 30722839 OR 30713713 OR 30711345 OR 30709077 OR 30704395 OR 30703574 OR 30692512 OR 30684375 OR 30684253 OR 30677127 OR 30676417 OR 30676338 OR 30672975 OR 30672747 OR 30669705 OR 30665700 OR 30665420 OR 30665282 OR 30642776 OR 30642349 OR 30642317 OR 30640889 OR 30630249 OR 30629932 OR 30628554 OR 30626363 OR 30622042 OR 30612210 OR 30607988 OR 30604673 OR 30592673 OR 30587921 OR 30585828 OR 30585748 OR 30577310 OR 30572825 OR 30572492 OR 30572147 OR 30563639 OR 30563555 OR 30560279 OR 30558650 OR 30523012 OR 30535985 OR 30531535 OR 30531534 OR 30531367 OR 30530262 OR 30526981 OR 30521764 OR 30518685 OR 30516588 OR 30516587 OR 30516585 OR 30512128 OR 30479235 OR 30477976 OR 30475777 OR 30467679 OR 30466763 OR 30465069 OR 30462621 OR 30460868 OR 30455077 OR 30453774 OR 30453220 OR 30451100 OR 30447683 OR 30444793 OR 30431366 OR 30431163 OR 30429074 OR 30421177 OR 30420790 OR 30419903 OR 30417861 OR 30417214 OR 30409352 OR 30409234 OR 30402484 OR 30396806 OR 30396789 OR 30394885 OR 30388493 OR 30385539 OR 30383290 OR 30379668 OR 30379653 OR 30377246 OR 30375281 OR 30367643 OR 30361119 OR 30359616 OR 30359410 OR 30353384 OR 30353383 OR 30353381 OR 30350170 OR 30347031 OR 30337083 OR 30336419 OR 30334820 OR 30326893 OR 30321833 OR 30321489 OR 30317205 OR 30314927 OR 30312186 OR 30308549 OR 30308440 OR 30303837 OR 30299309 OR 30296789 OR 30291376 OR 30284639 OR 30284167 OR 30282819 OR 30278965 OR 30277896 OR 30277108 OR 30274009 OR 30257702 OR 30247273 OR 30247245 OR 30243301 OR 30241492 OR 30236893 OR 30223702 OR 30223700 OR 30222649 OR 30216736 OR 30210781 OR 30206081 OR 30189088 OR 30188745 OR 30185768 OR 30171880 OR 30166413 OR 30157406 OR 30156308 OR 30152849 OR 30138573 OR 30134113 OR 30124627 OR 30121790 OR 30115127 OR 30114706 OR 30113776 OR 30098575 OR 30097303 OR 30096634 OR 30096521 OR 30095500 OR 30091035 OR 30088861 OR 30078618 OR 30074980 OR 30064040 OR 30060929 OR 30058295 OR 30049521 OR 30048331 OR 30045333 OR 30044238 OR 30041997 OR 30041582 OR 30037713 OR 30037534 OR 30028782 OR 30028364 OR 30028363 OR 30024428 OR 30004910 OR 30001410 OR 30001171 OR 29995542 OR 29995087 OR 29991643 OR 29981007 OR 29977468 OR 29976250 OR 29970013 OR 29953244 OR 29947888 OR 29935697 OR 29933169 OR 29923842 OR 29920152 OR 29914229 OR 29912645 OR 29907269 OR 29907087 OR 29903600 OR 29901798 OR 29886120 OR 29886117 OR 29884275 OR 29881987 OR 29878965 OR 29868517 OR 29866695 OR 29863265 OR 29862257 OR 29859104 OR 29856834 OR 29852853 OR 29845479 OR 29804790 OR 29803010 OR 29793554 OR 29791822 OR 29790144 OR 29788993 OR 29784498 OR 29782179 OR 29775606 OR 29774445 OR 29773665 OR 29771945 OR 29771610 OR 29754942 OR 29753454 OR 29748427 OR 29745620 OR 29743121 OR 29743094 OR 29742212 OR 29739430 OR 29735235 OR 29734646 OR 29733073 OR 29727522 OR 29723056 OR 29722344 OR 29722341 OR 29722332 OR 29720277 OR 29716909 OR 29715710 OR 29713897 OR 29699897 OR 29684352 OR 29681395 OR 29670906 OR 29670676 OR 29669772 OR 29657094 OR 29641221 OR 29638143 OR 29637922 OR 29635569 OR 29632996 OR 29626970 OR 29624027 OR 29622695 OR 29622574 OR 29622277 OR 29611348 OR 29606872 OR 29599422 OR 29599209 OR 29596290 OR 29595563 OR 29595185 OR 29584451 OR 29582175 OR 29575957 OR 29574851 OR 29573959 OR 29570350 OR 29570107 OR 29566734 OR 29561442 OR 29561370 OR 29554433 OR 29553813 OR 29550620 OR 29528946 OR 29528904 OR 29522858 OR 29521713 OR 29519311 OR 29519254 OR 29508167 OR 29508014 OR 29501285 OR 29486904 OR 29485547 OR 29485489 OR 29484641 OR 29477989 OR 29477144 OR 29475100 OR 29471707 OR 29469546 OR 29466596 OR 29466593 OR 29466577 OR 29462936 OR 29461889 OR 29436001 OR 29432350 OR 29431490 OR 29429931 OR 29426584 OR 29426051 OR 29426050 OR 29426048 OR 29426047 OR 29425776 OR 29420904 OR 29420246 OR 29415701 OR 29398292 OR 29386048 OR 29367411 OR 29365277 OR 29360002 OR 29351405 OR 29350567 OR 29349687 OR 29345967 OR 29345574 OR 29345066 OR 29340723 OR 29337804 OR 29337729 OR 29325841 OR 29325586 OR 29324568 OR 29324515 OR 29323536 OR 29316749 OR 29313706 OR 29293150 OR 29282040 OR 29279362 OR 29276865 OR 29275617 OR 29271843 OR 29270678 OR 29261565 OR 29258592 OR 29249578 OR 29241014 OR 29238846 OR 29233852 OR 29232156 OR 29227369 OR 29227313 OR 29221484 OR 29220857 OR 29218379 OR 29208025 OR 29207907 OR 29199052 OR 29194339 OR 29194281 OR 29194169 OR 29194057 OR 29189633 OR 29189313 OR 29189296 OR 29182886 OR 29180183 OR 29179699 OR 29179681 OR 29179596 OR 29176404 OR 29176330 OR 29176329 OR 29175086 OR 29174776 OR 29174419 OR 29173003 OR 29166922 OR 29162066 OR 29153427 OR 29150095 OR 29149363 OR 29146585 OR 29146420 OR 29140963 OR 29135617 OR 29135500 OR 29132978 OR 29132514 OR 29132404 OR 29128520 OR 29128166 OR 29127419 OR 29125306 OR 29116998 OR 29112078 OR 29103390 OR 29102631 OR 29099443 OR 29098546 OR 29096634 OR 29092868 OR 29090964 OR 29090957 OR 29084500 OR 29084498 OR 29079016 OR 29078756 OR 29073535 OR 29073534 OR 29068269 OR 29066591 OR 29058310 OR 29054892 OR 29045280 OR 29043837 OR 29043834 OR 29043832 OR 29042462 OR 29040264 OR 29037221 OR 29035914 OR 29034214 OR 29033043 OR 29032875 OR 29019797 OR 29019530 OR 29018041 OR 29016366 OR 28991832 OR 28991831 OR 28986731 OR 28985479 OR 28977263 OR 28977255 OR 28977254 OR 28977101 OR 28977098 OR 28973363 OR 28967868 OR 28966007 OR 28962942 OR 28962939 OR 28960939 OR 28957897 OR 28953669 OR 28947844 OR 28947428 OR 28947043 OR 28946986 OR 28943026 OR 28942398 OR 28940011 OR 28938253 OR 28936950 OR 28936695 OR 28935455 OR 28930815 OR 28930639 OR 28926488 OR 28923478 OR 28918201 OR 28910913 OR 28910146 OR 28905112 OR 28905076 OR 28899408 OR 28895618 OR 28887934 OR 28887928 OR 28877748 OR 28873275 OR 28872540 OR 28867256 OR 28864904 OR 28863024 OR 28863011 OR 28857906 OR 28846578 OR 28846571 OR 28846440 OR 28826081 OR 28821973 OR 28820175 OR 28820028 OR 28812117 OR 28807204 OR 28807071 OR 28806218 OR 28803505 OR 28803440 OR 28802791 OR 28796690 OR 28792873 OR 28792872 OR 28778920 OR 28774316 OR 28771042 OR 28767270 OR 28765493 OR 28763269 OR 28762770 OR 28762769 OR 28762764 OR 28759168 OR 28756973 OR 28756400 OR 28751632 OR 28749854 OR 28746224 OR 28745850 OR 28744626 OR 28742539 OR 28741891 OR 28736018 OR 28735156 OR 28734804 OR 28733094 OR 28724884 OR 28724041 OR 28717835 OR 28708421 OR 28707977 OR 28707030 OR 28705414 OR 28705304 OR 28701178 OR 28697503 OR 28696778 OR 28694198 OR 28684287 OR 28678521 OR 28677019 OR 28673618 OR 28669500 OR 28669372 OR 28668708 OR 28667214 OR 28664851 OR 28664850 OR 28664849 OR 28664154 OR 28662370 OR 28661978 OR 28659366 OR 28652633 OR 28645414 OR 28643320 OR 28642106 OR 28638160 OR 28636403 OR 28622342 OR 28615012 OR 28614941 OR 28607338 OR 28604506 OR 28602752 OR 28596273 OR 28592332 OR 28585855 OR 28583555 OR 28578113 OR 28573250 OR 28570350 OR 28559468 OR 28557528 OR 28556301 OR 28555461 OR 28554924 OR 28551923 OR 28551051 OR 28550403 OR 28538439 OR 28537429 OR 28536282 OR 28530111 OR 28526233 OR 28525416 OR 28522797 OR 28511660 OR 28510757 OR 28510501 OR 28510235 OR 28507378 OR 28506729 OR 28502521 OR 28499130 OR 28485315 OR 28484089 OR 28482425 OR 28474627 OR 28460592 OR 28460591 OR 28459743 OR 28459336 OR 28459322 OR 28457008 OR 28450200 OR 28449321 OR 28446599 OR 28444079 OR 28442589 OR 28442313 OR 28441233 OR 28440124 OR 28434548 OR 28432405 OR 28432351 OR 28427745 OR 28424885 OR 28422776 OR 28422775 OR 28410641 OR 28410318 OR 28409685 OR 28407831 OR 28406814 OR 28406724 OR 28402093 OR 28401379 OR 28386726 OR 28385915 OR 28380189 OR 28379390 OR 28372914 OR 28368919 OR 28366167 OR 28366166 OR 28363282 OR 28362540 OR 28358594 OR 28357836 OR 28356130 OR 28351905 OR 28343949 OR 28343880 OR 28343415 OR 28343152 OR 28341439 OR 28328787 OR 28326491 OR 28323763 OR 28323236 OR 28317096 OR 28306515 OR 28306336 OR 28304180 OR 28302253 OR 28301417 OR 28294285 OR 28284297 OR 28284294 OR 28283699 OR 28277990 OR 28277329 OR 28269224 OR 28268884 OR 28260175 OR 28259481 OR 28259355 OR 28257336 OR 28256475 OR 28252536 OR 28248130 OR 28245137 OR 28244617 OR 28242147 OR 28241958 OR 28240689 OR 28238441 OR 28237779 OR 28236803 OR 28236392 OR 28236390 OR 28236258 OR 28230150 OR 28225887 OR 28225865 OR 28223465 OR 28215409 OR 28208675 OR 28205623 OR 28204859 OR 28199167 OR 28196469 OR 28190548 OR 28188062 OR 28187049 OR 28186706 OR 28184033 OR 28183395 OR 28178996 OR 28178076 OR 28178046 OR 28168966 OR 28159160 OR 28159154 OR 28159013 OR 28157386 OR 28157140 OR 28154251 OR 28146639 OR 28146637 OR 28145771 OR 28145235 OR 28132594 OR 28132075 OR 28125527 OR 28124861 OR 28121615 OR 28118166 OR 28118145 OR 28114715 OR 28114714 OR 28114713 OR 28114712 OR 28114193 OR 28110388 OR 28108768 OR 28103448 OR 28099388 OR 28091345 OR 28089816 OR 28087868 OR 28085171 OR 28082531 OR 28079607 OR 28074230 OR 28067712 OR 28060170 OR 28054897 OR 28052047 OR 28046003 OR 28043430 OR 28040987 OR 28040752 OR 28040370 OR 30179417 OR 28038339 OR 28036088 OR 28035861 OR 28033137 OR 28033136 OR 28030441 OR 28028977 OR 28026113 OR 28017308 OR 28013329 OR 28012426 OR 28009154 OR 28004376 OR 28004129 OR 28000205 OR 28000204 OR 27999152 OR 27990710 OR 27984533 OR 27984319 OR 27984004 OR 27983872 OR 27983485 OR 27980253 OR 27965411 OR 27939824 OR 27925446 OR 27925054 OR 27924353 OR 27923936 OR 27923488 OR 27922846 OR 27919283 OR 27916285 OR 27913720 OR 27910298 OR 27905694 OR 27903788 OR 27903300 OR 27900922 OR 27899151 OR 30646442 OR 27898439 OR 27898438 OR 27898437 OR 27898436 OR 27898220 OR 27894328 OR 27892596 OR 27890497 OR 27887602 OR 27879560 OR 27875410 OR 27875409 OR 27865538 OR 27861182 OR 27855477 OR 27852713 OR 27846471 OR 27846240 OR 27842755 OR 27842745 OR 27842744 OR 27836935 OR 27836209 OR 27822747 OR 27818334 OR 27815586 OR 27546760 OR 27511813 OR 27704259 OR 27799180 OR 29894618 OR 29894610 OR 27798315 OR 27797616 OR 27660253 OR 27792078 OR 27788018 OR 27787651 OR 27451827 OR 27779896 OR 27779577 OR 27776936 OR 27769308 OR 27647562 OR 27504958 OR 27763913 OR 27762438 OR 27757516 OR 27620291 OR 27586996 OR 27272761 OR 27755233 OR 27755068 OR 27753501 OR 27752737 OR 27752736 OR 27752735 OR 27058048 OR 27749338 OR 27748659 OR 27745549 OR 26957118 OR 27743827 OR 27741949 OR 27737558 OR 27734109 OR 27724976 OR 27721108 OR 27716101 OR 27694355 OR 27693068 OR 27692826 OR 27692755 OR 27686440 OR 27685787 OR 27684585 OR 27673315 OR 27673312 OR 27668315 OR 27664487 OR 27661864 OR 27657575 OR 27651443 OR 27649636 OR 27637433 OR 27635737 OR 27634821 OR 27632800 OR 27631452 OR 27626833 OR 27625421 OR 27623960 OR 27623356 OR 27623083 OR 27620287 OR 27611637 OR 27609843 OR 27607575 OR 27600419 OR 27598383 OR 27596367 OR 27592605 OR 27590633 OR 27586277 OR 27577325 OR 27576283 OR 27548725 OR 27545828 OR 27535955 OR 29263511 OR 27525994 OR 27521425 OR 27520871 OR 27520712 OR 27520356 OR 27518321 OR 27515163 OR 27515160 OR 27515159 OR 27515158 OR 27513822 OR 27513791 OR 27513687 OR 27500964 OR 27498004 OR 27487001 OR 27484108 OR 27473750 OR 27460102 OR 27458040 OR 27457468 OR 27449641 OR 27440140 OR 27439509 OR 27436098 OR 27434453 OR 27434452 OR 27434449 OR 27432039 OR 27430873 OR 27411461 OR 27411456 OR 27411451 OR 27410404 OR 27400909 OR 27391293 OR 27389383 OR 27383316 OR 27381702 OR 27381201 OR 27373812 OR 27373439 OR 27367886 OR 27367766 OR 27367765 OR 27363212 OR 27357690 OR 27351572 OR 27347773 OR 27347707 OR 27342819 OR 27339683 OR 27339156 OR 27336170 OR 27334879 OR 27334266 OR 27324241 OR 27321795 OR 27318943 OR 27318572 OR 27318344 OR 27310978 OR 27310555 OR 27288621 OR 27283464 OR 27283190 OR 27276781 OR 27271548 OR 27264576 OR 27260640 OR 27258527 OR 27258220 OR 27255913 OR 27251597 OR 27247503 OR 27245054 OR 27244715 OR 27235320 OR 27235316 OR 27235314 OR 27235313 OR 27235312 OR 27232279 OR 27221951 OR 27215212 OR 27213599 OR 27207341 OR 27203510 OR 27192860 OR 27189476 OR 27188409 OR 27179988 OR 27179847 OR 27179673 OR 27179463 OR 27177646 OR 27169535 OR 27168514 OR 27159648 OR 27154158 OR 27149459 OR 27142073 OR 27139256 OR 27132449 OR 27132441 OR 27132438 OR 27130442 OR 27118297 OR 27117075 OR 27113688 OR 27111514 OR 27101363 OR 27096680 OR 27096672 OR 27095122 OR 27094392 OR 27092677 OR 27088168 OR 27085737 OR 27084180 OR 27083027 OR 27083026 OR 27075363 OR 27075163 OR 27073113 OR 27067896 OR 27064380 OR 27060027 OR 27057912 OR 27055857 OR 27048605 OR 27045903 OR 27045902 OR 27043185 OR 27040103 OR 27040102 OR 27038888 OR 27038480 OR 27035237 OR 27035236 OR 27032012 OR 27031735 OR 27022981 OR 27020770 OR 27018313 OR 27016981 OR 27016424 OR 27015915 OR 27010144 OR 27007777 OR 27007110 OR 27007108 OR 27007106 OR 27007105 OR 27007104 OR 27007100 OR 27000388 OR 26999659 OR 26999639 OR 26988416 OR 26984318 OR 26980194 OR 26972902 OR 26972901 OR 26972484 OR 26971033 OR 26969670 OR 26968969 OR 26968294 OR 26963436 OR 26963321 OR 26963304 OR 26962064 OR 26957117 OR 26942447 OR 26942349 OR 26940945 OR 26937920 OR 26936876 OR 26935053 OR 26932347 OR 26930425 OR 26930154 OR 26929604 OR 26928642 OR 26928038 OR 26923646 OR 26919679 OR 26915547 OR 26915253 OR 26912528 OR 26910760 OR 26910236 OR 26905925 OR 26905184 OR 26903337 OR 26903334 OR 26903328 OR 26897507 OR 26896214 OR 26895644 OR 26893318 OR 26891699 OR 26891674 OR 26890195 OR 26883257 OR 26883256 OR 26883255 OR 26881996 OR 26881489 OR 26864571 OR 26864456 OR 26862069 OR 26862019 OR 26861596 OR 26861387 OR 26860032 OR 26857198 OR 26849830 OR 26848884 OR 26847501 OR 26846569 OR 26834205 OR 26832963 OR 26825951 OR 26825433 OR 26821714 OR 26821255 OR 26820274 OR 26817653 OR 26812599 OR 26807686 OR 26806842 OR 26804922 OR 26790856 OR 26788836 OR 26787699 OR 26780291 OR 26771794 OR 26771790 OR 26771392 OR 26768245 OR 26764577 OR 26761481 OR 26760995 OR 26757894 OR 26757701 OR 26754207 OR 26750681 OR 26750680 OR 26750623 OR 26741580 OR 26733723 OR 26732769 OR 26728700 OR 26728359 OR 29944225 OR 26720734 OR 26701365 OR 26701008 OR 26699917 OR 26687392 OR 26686509 OR 26683127 OR 26679016 OR 26677970 OR 26674455 OR 26674451 OR 26672935 OR 26672930 OR 26672923 OR 26670317 OR 26669996 OR 26669995 OR 26669034 OR 26668204 OR 26666907 OR 26664305 OR 26657704 OR 26651376 OR 26650055 OR 26648661 OR 26646464 OR 26645555 OR 26645554 OR 26645553 OR 26645552 OR 26645551 OR 26645226 OR 26643859 OR 26636760 OR 26630877 OR 26628543 OR 26627982 OR 26627538 OR 26627536 OR 26626060 OR 26623682 OR 26614241 OR 26614238 OR 26613253 OR 26611225 OR 26609693 OR 26600446 OR 26598954 OR 26595042 OR 26595041 OR 26595040 OR 26589569 OR 26589463 OR 26584191 OR 26578396 OR 26577199 OR 26575659 OR 26575164 OR 26571783 OR 26569171 OR 26568015 OR 26563763 OR 26561745 OR 26559350 OR 26559154 OR 26555558 OR 26552136 OR 26550624 OR 26543168 OR 26542650 OR 26531175 OR 26530695 OR 26527580 OR 26525658 OR 26521517 OR 29897699 OR 29897698 OR 26518584 OR 26518065 OR 26509816 OR 26508525 OR 26506672 OR 26499478 OR 26497413 OR 26496445 OR 26494395 OR 26493593 OR 26493592 OR 26493043 OR 26492410 OR 26488219 OR 26483352 OR 26482659 OR 26475257 OR 26474112 OR 26461237 OR 26457754 OR 26449575 OR 26446805 OR 26438222 OR 26436599 OR 26436296 OR 26427588 OR 26424717 OR 26424610 OR 26423454 OR 26415679 OR 26410682 OR 26408150 OR 26405188 OR 26399892 OR 26399891 OR 26399890 OR 26397017 OR 26386218 OR 26383835 OR 26376260 OR 26373682 OR 26370406 OR 26363569 OR 26359160 OR 26353873 OR 26344605 OR 26340153 OR 26339627 OR 26338439 OR 26337158 OR 26333431 OR 26331971 OR 26330436 OR 29077373 OR 26317800 OR 26317621 OR 26307886 OR 26307595 OR 26307004 OR 26306379 OR 26304275 OR 26301250 OR 26296270 OR 26296269 OR 26294418 OR 26289012 OR 26283075 OR 26274770 OR 26274711 OR 26274707 OR 26273936 OR 26271929 OR 26271905 OR 26271685 OR 26267908 OR 26264335 OR 26263439 OR 26261640 OR 26259140 OR 26256848 OR 26248201 OR 26247675 OR 26244915 OR 26234832 OR 26232804 OR 26230299 OR 26224249 OR 26216357 OR 26211010 OR 26211009 OR 26200722 OR 26198099 OR 26192398 OR 26187741 OR 26184293 OR 26181437 OR 26181296 OR 26181133 OR 26181132 OR 26178769 OR 26176679 OR 26174419 OR 26170310 OR 26166324 OR 26160730 OR 26160728 OR 26160269 OR 26159015 OR 26148354 OR 26140072 OR 26138944 OR 26138630 OR 26135199 OR 26134116 OR 26132548 OR 26131598 OR 26130623 OR 26130322 OR 26118914 OR 26118089 OR 26116507 OR 26116481 OR 26110877 OR 26102313 OR 26102252 OR 26086289 OR 26077046 OR 26075422 OR 26073233 OR 26072388 OR 26066017 OR 26063106 OR 26061818 OR 26060032 OR 26060028 OR 26053378 OR 26050081 OR 26041403 OR 26033133 OR 26033076 OR 26031744 OR 26014437 OR 26007294 OR 26003545 OR 26003524 OR 26002528 OR 25997942 OR 25997751 OR 25997564 OR 25997046 OR 25993389 OR 25990432 OR 25985386 OR 25982042 OR 25981598 OR 25981444 OR 25977119 OR 25971386 OR 25971385 OR 25966100 OR 25962375 OR 25959306 OR 25958708 OR 25956681 OR 25955983 OR 25954759 OR 25943099 OR 25939155 OR 25929255 OR 25927671 OR 25923575 OR 25923142 OR 25914957 OR 25904567 OR 25903964 OR 25890656 OR 25890655 OR 25890654 OR 25889393 OR 25888428 OR 25887847 OR 25887616 OR 25887566 OR 25887146 OR 25886896 OR 25886755 OR 25885371 OR 25884385 OR 25882607 OR 25881732 OR 25881222 OR 25877831 OR 25876111 OR 25876110 OR 25866361 OR 25862042 OR 25862040 OR 25860445 OR 25858621 OR 25855884 OR 25851019 OR 25844759 OR 25843526 OR 25836599 OR 25835406 OR 25832933 OR 25830838 OR 25830837 OR 25830831 OR 25827859 OR 25827858 OR 25827586 OR 25825186 OR 25824000 OR 25818695 OR 25814671 OR 25813548 OR 25813495 OR 25804468 OR 25801644 OR 25801596 OR 25800686 OR 25800583 OR 25792206 OR 25792205 OR 25792201 OR 25792200 OR 25789816 OR 25786405 OR 25771667 OR 25770594 OR 25768357 OR 25765493 OR 25764572 OR 25752302 OR 25751294 OR 25747632 OR 25746744 OR 25742900 OR 25742257 OR 25742126 OR 25742022 OR 25736472 OR 25731636 OR 25731530 OR 25727657 OR 25726565 OR 25726563 OR 25724604 OR 25722287 OR 25719275 OR 25715499 OR 25706496 OR 25700065 OR 25695069 OR 25693178 OR 25693014 OR 25684012 OR 25682346 OR 25679441 OR 25676118 OR 25674635 OR 25673260 OR 25672440 OR 25672061 OR 25667180 OR 25662756 OR 25662070 OR 25656010 OR 25654173 OR 25639401 OR 25635932 OR 25635492 OR 25635491 OR 25634883 OR 25634565 OR 25632631 OR 25625312 OR 25607276 OR 25607272 OR 25605469 OR 25599942 OR 25599504 OR 25599503 OR 25599476 OR 25599472 OR 25599463 OR 25596299 OR 25590156 OR 25580530 OR 25578295 OR 25577132 OR 25577031 OR 25575703 OR 25572932 OR 25569397 OR 25567337 OR 25567336 OR 25565460 OR 25560864 OR 25560852 OR 25560706 OR 25560681 OR 25559436 OR 25556379 OR 25549764 OR 25549491 OR 25549488 OR 25549486 OR 25549028 OR 25546913 OR 25546534 OR 25546533 OR 25546532 OR 25539543 OR 25537934 OR 25537799 OR 25533963 OR 25533831 OR 25529341 OR 25529339 OR 25527375 OR 25526714 OR 25524779 OR 25517889 OR 25511406 OR 25510776 OR 25503749 OR 25502842 OR 25501020 OR 25501019 OR 25499483 OR 25498532 OR 25497162 OR 25494217 OR 25491480 OR 25488529 OR 25487240 OR 25486668 OR 25486576 OR 25486575 OR 25486574 OR 25480350 OR 25479924 OR 25478722 OR 25478681 OR 25476982 OR 25476981 OR 25472571 OR 25471809 OR 25471001 OR 25466343 OR 25466320 OR 25465643 OR 25464516 OR 25458459 OR 25458236 OR 25456775 OR 25454942 OR 25453428 OR 25453427 OR 25453426 OR 25453425 OR 25453424 OR 25453423 OR 25453421 OR 25453420 OR 25453418 OR 25453417 OR 25453416 OR 25443094 OR 25442984 OR 25441040 OR 25440628 OR 25436786 OR 25436785 OR 25429808 OR 25425351 OR 25423122 OR 25420925 OR 25419831 OR 25416275 OR 25414246 OR 25408396 OR 25406347 OR 25399895 OR 25399894 OR 25399893 OR 25399892 OR 25398108 OR 25393702 OR 25393331 OR 25391514 OR 25386717 OR 25385866 OR 25372917 OR 25371400 OR 25371037 OR 25369934 OR 25368219 OR 25367463 OR 25364957 OR 25362902 OR 25361183 OR 25352004 OR 25349127 OR 25343201 OR 25343197 OR 25336536 OR 25319915 OR 25317472 OR 25317470 OR 25314313 OR 25314088 OR 25309125 OR 25305240 OR 25304459 OR 25300627 OR 25300436 OR 25299354 OR 25295819 OR 25294935 OR 25290099 OR 25288000 OR 25287106 OR 25282234 OR 25282233 OR 25273618 OR 25268516 OR 25268099 OR 25266521 OR 25266477 OR 25259893 OR 25257964 OR 25253977 OR 25251585 OR 25249517 OR 25248040 OR 25244817 OR 25239385 OR 25239275 OR 25233520 OR 25233519 OR 25233517 OR 25233383 OR 25232765 OR 25227581 OR 25219148 OR 25214888 OR 25214765 OR 25209989 OR 25208731 OR 25205391 OR 25201565 OR 25196505 OR 25195931 OR 25189285 OR 25187754 OR 25184877 OR 25184876 OR 25184608 OR 25183570 OR 25179413 OR 25179022 OR 25179020 OR 25179019 OR 25179018 OR 25176974 OR 25174379 OR 25174313 OR 25162475 OR 25159353 OR 25159261 OR 25159175 OR 25158102 OR 25155370 OR 25152048 OR 25146509 OR 25145338 OR 25144326 OR 25140364 OR 25139214 OR 25137208 OR 25135630 OR 25128980 OR 25124903 OR 25124901 OR 25119574 OR 25115557 OR 25112501 OR 25112500 OR 25111648 OR 25111640 OR 25110462 OR 25105820 OR 25102987 OR 25100435 OR 25098333 OR 25097070 OR 27069995 OR 27069994 OR 27069988 OR 25079591 OR 25076100 OR 25070899 OR 25068248 OR 25062496 OR 25062435 OR 25050574 OR 25050573 OR 25049344 OR 25046529 OR 25042412 OR 25041593 OR 25041589 OR 25034477 OR 25032876 OR 25032875 OR 25029254 OR 25029161 OR 25029160 OR 25029154 OR 25029153 OR 25029141 OR 25028955 OR 25025695 OR 25022165 OR 25017836 OR 25011506 OR 25005005 OR 25004064 OR 25003980 OR 24997586 OR 24996606 OR 24993464 OR 24986596 OR 24983618 OR 24979554 OR 24977439 OR 24975658 OR 24974563 OR 24972511 OR 24967770 OR 24957974 OR 24952825 OR 24938537 OR 24937499 OR 24936694 OR 24932132 OR 24930535 OR 24930534 OR 24930533 OR 24930526 OR 24927376 OR 24919111 OR 24916482 OR 24898108 OR 24894664 OR 24891325 OR 24890446 OR 24887179 OR 24887155 OR 24887034 OR 24886674 OR 24886559 OR 24886221 OR 24882282 OR 24881932 OR 24881080 OR 24881070 OR 24875195 OR 24863923 OR 24856990 OR 24853585 OR 24848416 OR 24847737 OR 24842436 OR 24836810 OR 24835850 OR 24835849 OR 24832743 OR 24832577 OR 24830802 OR 24830677 OR 24830508 OR 24830404 OR 24825269 OR 24824234 OR 24823332 OR 24821338 OR 24818339 OR 24814973 OR 24814840 OR 24813489 OR 24810528 OR 24809711 OR 24809262 OR 24809261 OR 24801423 OR 24792475 OR 24791898 OR 24780650 OR 24780004 OR 24768567 OR 24768565 OR 24768337 OR 24762100 OR 24756380 OR 24747460 OR 24736357 OR 24734313 OR 24734124 OR 24733692 OR 24732023 OR 24725670 OR 24724902 OR 24724250 OR 24723623 OR 24722176 OR 24722174 OR 24721387 OR 24720856 OR 24719580 OR 24718644 OR 24717858 OR 24717630 OR 24717629 OR 24716641 OR 24716610 OR 24716510 OR 24716422 OR 24716392 OR 24712850 OR 24708846 OR 24708472 OR 24705783 OR 24705570 OR 24702798 OR 24702248 OR 24701146 OR 24694683 OR 24693864 OR 24681030 OR 24670268 OR 24670228 OR 24667919 OR 24666961 OR 24659547 OR 24649790 OR 24646783 OR 24643021 OR 24642172 OR 24642043 OR 24636928 OR 24633189 OR 24632673 OR 24625534 OR 24624859 OR 24623359 OR 24621125 OR 24616596 OR 24605571 OR 24601110 OR 24591671 OR 24588101 OR 24588087 OR 24587001 OR 24582826 OR 24579839 OR 24578354 OR 24571865 OR 24569355 OR 24565094 OR 24556914 OR 24556654 OR 24554247 OR 24549460 OR 24549012 OR 24534976 OR 24534965 OR 24528322 OR 24514031 OR 24508203 OR 24508200 OR 24507725 OR 24503270 OR 24503265 OR 24503258 OR 24500437 OR 24493554 OR 24493194 OR 24492665 OR 24490296 OR 24485531 OR 24475634 OR 24475633 OR 24469236 OR 24467647 OR 24461759 OR 24458052 OR 24457489 OR 24456952 OR 24448340 OR 24447458 OR 24445980 OR 24443905 OR 24435203 OR 24434457 OR 24434443 OR 24431271 OR 24430553 OR 24428648 OR 24417247 OR 24413319 OR 24412021 OR 24406030 OR 24405693 OR 24400552 OR 24399068 OR 24390242 OR 24382538 OR 24381187 OR 24378042 OR 24373614 OR 24370952 OR 24368367 OR 24368348 OR 24366167 OR 24363503 OR 24361970 OR 24360126 OR 24356284 OR 24347240 OR 24347224 OR 24345852 OR 24342819 OR 24341001 OR 24340994 OR 24335657 OR 24335656 OR 24335655 OR 24335654 OR 24332661 OR 24332252 OR 24331947 OR 24331945 OR 24328770 OR 24327781 OR 24327745 OR 24326973 OR 24326729 OR 24322337 OR 24321808 OR 24320970 OR 24319886 OR 24318727 OR 24309954 OR 24300620 OR 24299918 OR 24296379 OR 24295151 OR 24290732 OR 24287726 OR 24286408 OR 24282318 OR 24279808 OR 24267541 OR 24261254 OR 24259726 OR 24257787 OR 24257150 OR 24255157 OR 24247614 OR 24240818 OR 24229465 OR 24226491 OR 24225960 OR 24224388 OR 24215377 OR 24222262 OR 24215648 OR 24199628 OR 24196193 OR 24193181 OR 24189857 OR 24189856 OR 24189855 OR 24189854 OR 24182874 OR 24172270 OR 24172054 OR 24170143 OR 24162683 OR 24158166 OR 24156846 OR 24156845 OR 24156844 OR 24156843 OR 24156842 OR 24156840 OR 24156839 OR 24152589 OR 24137575 OR 24134414 OR 24133191 OR 24132038 OR 24131675 OR 24127739 OR 24127120 OR 24126673 OR 24119704 OR 24119700 OR 24117786 OR 24114319 OR 24110913 OR 24110912 OR 24108727 OR 24102072 OR 24094391 OR 24089414 OR 24088995 OR 24082167 OR 24081437 OR 24073540 OR 24069668 OR 24069078 OR 24069063 OR 24034492 OR 24034491 OR 24064877 OR 24064715 OR 24059413 OR 24050515 OR 24048661 OR 24047538 OR 24046465 OR 24042385 OR 24039155 OR 24037749 OR 24037225 OR 24033942 OR 24032377 OR 24028755 OR 24026214 OR 24024608 OR 24012230 OR 24009007 OR 24004842 OR 24004131 OR 24004130 OR 24004129 OR 24004128 OR 24004127 OR 23999764 OR 23993772 OR 23992090 OR 23989653 OR 23985422 OR 23985086 OR 23982730 OR 23982022 OR 23981807 OR 23981589 OR 23959781 OR 23957905 OR 23954453 OR 23952860 OR 23952857 OR 23948029 OR 23947178 OR 23947177 OR 23939358 OR 23934723 OR 23934722 OR 23934720 OR 23934717 OR 23934714 OR 23934712 OR 23933641 OR 23933639 OR 23929165 OR 23928898 OR 23927713 OR 23921981 OR 23919226 OR 23917895 OR 23915497 OR 23911436 OR 23907498 OR 23907497 OR 23905752 OR 23905523 OR 23903852 OR 23903779 OR 23883896 OR 23892124 OR 23890541 OR 23890397 OR 23887087 OR 23881653 OR 23880084 OR 23863490 OR 23860806 OR 23857446 OR 23855595 OR 23855209 OR 23855040 OR 23849709 OR 23844839 OR 23842907 OR 23842232 OR 23839162 OR 23835725 OR 23832141 OR 23827735 OR 23820186 OR 23819351 OR 23814123 OR 23808504 OR 23808213 OR 23802683 OR 23799354 OR 23798663 OR 23796679 OR 23791070 OR 23782386 OR 23778833 OR 23778075 OR 23777655 OR 23775234 OR 23774345 OR 23774335 OR 23772530 OR 23772529 OR 23772528 OR 23772527 OR 23772526 OR 23772524 OR 23772523 OR 23769147 OR 23767322 OR 23761149 OR 23760348 OR 23759918 OR 23756329 OR 23752755 OR 23745188 OR 23742967 OR 23740697 OR 23738554 OR 23738553 OR 23738552 OR 23738551 OR 23738550 OR 23738549 OR 23736010 OR 23731684 OR 23729793 OR 23729792 OR 23729791 OR 23729790 OR 23720254 OR 23719655 OR 23711230 OR 23709192 OR 23706007 OR 23705524 OR 23705485 OR 23697748 OR 23697460 OR 23696688 OR 23695707 OR 23695266 OR 23691873 OR 23691230 OR 23688302 OR 23688300 OR 23673401 OR 23673003 OR 23672857 OR 23670087 OR 23659397 OR 23657244 OR 23656773 OR 23656767 OR 23656766 OR 23656764 OR 23649100 OR 23647509 OR 23644625 OR 23639659 OR 23635999 OR 23635930 OR 23633281 OR 23631814 OR 23625902 OR 23625898 OR 23615011 OR 23609289 OR 23607598 OR 23606231 OR 23602273 OR 23601696 OR 23601043 OR 23598290 OR 23592154 OR 23591211 OR 23589044 OR 23589008 OR 23588038 OR 23585581 OR 23584469 OR 23575611 OR 23572089 OR 23571870 OR 23566653 OR 23566547 OR 23564874 OR 23564539 OR 23561575 OR 23558717 OR 23551995 OR 23546489 OR 23545542 OR 23544810 OR 23544327 OR 23536166 OR 23535027 OR 23530796 OR 23528232 OR 23523027 OR 23515152 OR 23513524 OR 23512072 OR 23510269 OR 23509726 OR 23507723 OR 23506280 OR 23497608 OR 23497577 OR 23497557 OR 23484377 OR 23479040 OR 23467273 OR 23463162 OR 23461947 OR 23460570 OR 23457844 OR 23450549 OR 23450545 OR 23450544 OR 23450309 OR 23448861 OR 23443518 OR 23443286 OR 23443282 OR 23438779 OR 23437361 OR 23428562 OR 23426236 OR 23416114 OR 23412514 OR 23407996 OR 23402799 OR 23397665 OR 23397327 OR 23395312 OR 23394883 OR 23385318 OR 23384402 OR 23381724 OR 23380128 OR 23378436 OR 23374652 OR 23373129 OR 23370599 OR 23370121 OR 23368982 OR 23368428 OR 23362167 OR 23351488 OR 23350518 OR 23348974 OR 23346673 OR 23346672 OR 23341221 OR 23340937 OR 23339640 OR 23339639 OR 23339638 OR 23338572 OR 23338571 OR 23338570 OR 23331507 OR 23328258 OR 23328186 OR 23327952 OR 23321772 OR 23312679 OR 23306587 OR 23306584 OR 23306398 OR 23298282 OR 23295853 OR 23293972 OR 23291732 OR 23290034 OR 23290033 OR 23290032 OR 23287876 OR 23278552 OR 25232578 OR 25232577 OR 24697046 OR 23272466 OR 23271829 OR 23265592 OR 23265590 OR 23263574 OR 23262472 OR 23261071 OR 23260265 OR 23255845 OR 23255291 OR 23254166 OR 23247119 OR 23237824 OR 23233496 OR 23230873 OR 23229578 OR 23225509 OR 23224680 OR 23222676 OR 23222675 OR 23216436 OR 23216361 OR 23216359 OR 23214214 OR 23213644 OR 23211642 OR 23207527 OR 23200764 OR 23196419 OR 23187649 OR 23179334 OR 23177453 OR 23171712 OR 23164308 OR 23161164 OR 23160769 OR 23160104 OR 23158857 OR 23158856 OR 23157105 OR 23156849 OR 23156564 OR 23155145 OR 23153879 OR 23151992 OR 23148060 OR 23144331 OR 23138575 OR 23135694 OR 23132266 OR 23126005 OR 23114008 OR 23109312 OR 23108608 OR 23107304 OR 23107302 OR 23104461 OR 23103996 OR 23097941 OR 23097209 OR 23097207 OR 23093038 OR 23091371 OR 23089664 OR 23089499 OR 23089496 OR 23087262 OR 23082772 OR 23080454 OR 23075674 OR 23075595 OR 23065049 OR 23062623 OR 23062228 OR 23053725 OR 23051849 OR 23047198 OR 23044790 OR 23040775 OR 23040774 OR 23033233 OR 23028008 OR 23027909 OR 23025049 OR 23019678 OR 23017323 OR 23015728 OR 23014710 OR 23006692 OR 22993921 OR 22992967 OR 22990870 OR 22986672 OR 22976418 OR 22953649 OR 22948584 OR 22948576 OR 22948572 OR 22941546 OR 22941207 OR 22940892 OR 22934878 OR 22929542 OR 22926651 OR 22921855 OR 22920464 OR 22917818 OR 22916094 OR 22914430 OR 22914086 OR 22907521 OR 22907520 OR 22906363 OR 22903256 OR 22903102 OR 22898551 OR 22897124 OR 22897069 OR 22895826 OR 22894723 OR 22889477 OR 22885649 OR 22885439 OR 22884532 OR 22883052 OR 22878882 OR 22871759 OR 22870262 OR 22870239 OR 22858805 OR 22851778 OR 22850883 OR 22847221 OR 22846945 OR 22846562 OR 22834288 OR 22829002 OR 22824856 OR 22820154 OR 22818369 OR 22810359 OR 22802609 OR 22802512 OR 22802213 OR 22801199 OR 22800841 OR 22782614 OR 22781640 OR 22772855 OR 22766464 OR 22762937 OR 22762925 OR 22761125 OR 22753685 OR 22751373 OR 22748463 OR 22747918 OR 22745302 OR 22739564 OR 22735687 OR 22732292 OR 22732288 OR 22710250 OR 22699031 OR 22695433 OR 22689258 OR 22685248 OR 22683797 OR 22679275 OR 22673280 OR 22672249 OR 22670018 OR 22670017 OR 22665132 OR 22660993 OR 22659268 OR 22643543 OR 22642505 OR 22621267 OR 22613503 OR 22608332 OR 22607610 OR 22604198 OR 22588146 OR 22585200 OR 22583180 OR 22581364 OR 22580672 OR 22578896 OR 22571378 OR 22527664 OR 22527087 OR 22527061 OR 22526745 OR 22526744 OR 22520116 OR 22512390 OR 22511168 OR 22511149 OR 22511135 OR 22505204 OR 22503344 OR 22503228 OR 22498731 OR 22492988 OR 22475807 OR 22475700 OR 22472500 OR 22472499 OR 22461369 OR 22460854 OR 22459288 OR 22453545 OR 22451141 OR 22449795 OR 22448277 OR 22447264 OR 22438221 OR 22430234 OR 22429604 OR 22428500 OR 22411517 OR 22424528 OR 22424108 OR 22423668 OR 22417844 OR 22417712 OR 22417650 OR 22417046 OR 22417044 OR 22417038 OR 22416609 OR 22407374 OR 22407052 OR 22407034 OR 22404794 OR 22404068 OR 22398566 OR 22395116 OR 22391272 OR 22390652 OR 22386225 OR 22386062 OR 22386043 OR 22379922 OR 22379259 OR 22369998 OR 22360906 OR 22357372 OR 22354159 OR 22354142 OR 22352684 OR 22349425 OR 22348547 OR 22348347 OR 22348242 OR 22341559 OR 22340260 OR 22335315 OR 22335314 OR 22333146 OR 22333124 OR 22333066 OR 22323569 OR 22323078 OR 22323077 OR 22322623 OR 22318634 OR 22318105 OR 22316546 OR 22316539 OR 22316538 OR 22316533 OR 22316467 OR 22316466 OR 22316465 OR 22310870 OR 22308825 OR 22305402 OR 22298669 OR 22298370 OR 22294070 OR 22276454 OR 22272709 OR 22271813 OR 22269991 OR 22265270 OR 22258231 OR 22254484 OR 22249962 OR 22249049 OR 22245450 OR 22228837 OR 22228420 OR 22227447 OR 22227446 OR 22227381 OR 22226975 OR 22219410 OR 22210945 OR 23536735 OR 22206788 OR 22197762 OR 22197759 OR 22197038 OR 22196749 OR 22187085 OR 22186218 OR 22184790 OR 22183518 OR 22182757 OR 22179365 OR 22166903 OR 22166901 OR 22166727 OR 22161160 OR 22158275 OR 22157493 OR 22157255 OR 22157253 OR 22157194 OR 22154847 OR 22154798 OR 22152899 OR 22152762 OR 22148910 OR 22147610 OR 22147117 OR 22147116 OR 22143051 OR 22137296 OR 22134427 OR 22127483 OR 22120856 OR 22118978 OR 22114967 OR 22111353 OR 22105562 OR 22104487 OR 22097977 OR 22094172 OR 22092165 OR 22089890 OR 22089200 OR 22088881 OR 22088618 OR 22087681 OR 22086692 OR 22083016 OR 22082464 OR 22079132 OR 22078089 OR 22078086 OR 22075296 OR 22073537 OR 22071875 OR 22052933 OR 22046389 OR 22040865 OR 22040296 OR 22037734 OR 22027886 OR 22020433 OR 22020236 OR 22011921 OR 22011871 OR 22008400 OR 22008399 OR 22008397 OR 22004685 OR 22002204 OR 21999947 OR 21998261 OR 21997159 OR 21997157 OR 21997128 OR 21990569 OR 21986062 OR 21986061 OR 21986060 OR 21983371 OR 21979847 OR 21978476 OR 21976615 OR 21976614 OR 21975499 OR 21971320 OR 21968763 OR 21968473 OR 21965102 OR 21962301 OR 21958974 OR 21958549 OR 21957684 OR 21955757 OR 21946929 OR 21946655 OR 21944686 OR 21944680 OR 21941216 OR 21941160 OR 21926581 OR 21926390 OR 21923944 OR 21920920 OR 21920215 OR 21913408 OR 21905467 OR 21885390 OR 21879999 OR 21879998 OR 21869618 OR 21866369 OR 21865790 OR 21858522 OR 21858519 OR 21848179 OR 21848176 OR 21835357 OR 21838151 OR 21835586 OR 21828031 OR 21825975 OR 21825913 OR 21825265 OR 21818845 OR 21818036 OR 21813526 OR 21813525 OR 21799313 OR 21796657 OR 21794116 OR 21785528 OR 21778465 OR 21774724 OR 21770288 OR 21770287 OR 21770285 OR 21770283 OR 21770282 OR 21770281 OR 21770278 OR 21770272 OR 21767646 OR 21765359 OR 21764329 OR 21762562 OR 21762559 OR 21761595 OR 21757087 OR 21756812 OR 21756764 OR 21751650 OR 21742224 OR 21742221 OR 21742220 OR 21742219 OR 21742218 OR 21742217 OR 21742216 OR 21742215 OR 21742214 OR 21742213 OR 21742212 OR 21742211 OR 21742210 OR 21742208 OR 21741938 OR 21740675 OR 21740396 OR 21738350 OR 21730932 OR 21730927 OR 21730798 OR 21724416 OR 21718865 OR 21718474 OR 21709659 OR 21703814 OR 21699743 OR 21695880 OR 21688663 OR 21685756 OR 21682985 OR 21672281 OR 21669106 OR 21665410 OR 21656292 OR 21656291 OR 21654352 OR 21652617 OR 21647054 OR 21643873 OR 21642654 OR 21635753 OR 21633872 OR 21623343 OR 21621697 OR 21619644 OR 21618716 OR 21617626 OR 21617600 OR 21610587 OR 21610529 OR 21610406 OR 21609614 OR 21609556 OR 21602752 OR 21595575 OR 21593048 OR 21585132 OR 21584704 OR 21584441 OR 21575205 OR 21567070 OR 21560002 OR 21558298 OR 21555937 OR 21554679 OR 21550582 OR 21540810 OR 21540407 OR 21538204 OR 21538156 OR 21534293 OR 21532048 OR 21530097 OR 21525834 OR 21524955 OR 21523690 OR 21523689 OR 21520668 OR 21515759 OR 21512393 OR 21510774 OR 21507871 OR 21506055 OR 21496966 OR 21496378 OR 21494206 OR 21493033 OR 21489328 OR 21489320 OR 21485098 OR 21483388 OR 21483381 OR 21480843 OR 21474219 OR 21471743 OR 21471082 OR 21470014 OR 21464952 OR 21461608 OR 21460711 OR 21457509 OR 21456903 OR 21444305 OR 21441888 OR 21441833 OR 21441254 OR 21436351 OR 21429309 OR 21426691 OR 21424309 OR 21422686 OR 21420217 OR 21420028 OR 21418654 OR 21415738 OR 21407013 OR 21401517 OR 21397257 OR 21394619 OR 21385348 OR 21375102 OR 21372277 OR 21371901 OR 21369813 OR 21365313 OR 21359610 OR 21358318 OR 21354986 OR 21348591 OR 21339015 OR 21333453 OR 21333179 OR 21333178 OR 21329251 OR 21318437 OR 21317635 OR 21303865 OR 21298026 OR 21296699 OR 21285342 OR 21277449 OR 21275574 OR 21273973 OR 21273969 OR 21271478 OR 21268422 OR 21266694 OR 21266693 OR 21263377 OR 21262752 OR 21255504 OR 21255500 OR 21252837 OR 21252793 OR 21251372 OR 21251365 OR 21251363 OR 21251358 OR 21248533 OR 21248530 OR 21244685 OR 21242951 OR 21242598 OR 21239189 OR 21235829 OR 21226859 OR 21224945 OR 21223541 OR 21211010 OR 21208891 OR 21199551 OR 21198467 OR 21194862 OR 21194860 OR 21193784 OR 21193471 OR 21193470 OR 21164401 OR 21164400 OR 21164397 OR 21164396 OR 21164395 OR 22707466 OR 22674604 OR 21191657 OR 21188431 OR 21187747 OR 21184127 OR 21178909 OR 21178709 OR 21178555 OR 21178542 OR 21178533 OR 21176656 OR 21175322 OR 21175321 OR 21175320 OR 21171187 OR 21162963 OR 21158057 OR 21157319 OR 21157253 OR 21149366 OR 21149352 OR 21145192 OR 21143102 OR 21128752 OR 21126652 OR 21125784 OR 21124230 OR 21122185 OR 21122173 OR 21122169 OR 21119590 OR 21119333 OR 21106338 OR 21106025 OR 21102399 OR 21102388 OR 21088510 OR 21088343 OR 21084968 OR 21083362 OR 21083036 OR 21069520 OR 21069471 OR 21057351 OR 21057349 OR 21057316 OR 21049919 OR 21048239 OR 21041560 OR 21037548 OR 20979676 OR 20969708 OR 20959782 OR 20959754 OR 20949287 OR 20947911 OR 20941680 OR 20938259 OR 20937437 OR 20936936 OR 20933171 OR 20931744 OR 20924187 OR 20920128 OR 20890191 OR 20890174 OR 20889520 OR 20882619 OR 20881866 OR 20862506 OR 20860539 OR 20851923 OR 20850264 OR 20849512 OR 20845745 OR 20843254 OR 20843245 OR 20839142 OR 20838334 OR 20838119 OR 20837268 OR 20833831 OR 20833532 OR 20828461 OR 20827647 OR 20827644 OR 20827452 OR 20826508 OR 20823654 OR 20820950 OR 20820146 OR 20820141 OR 20810412 OR 20806836 OR 20805764 OR 20805722 OR 20804560 OR 20804042 OR 20801416 OR 20800525 OR 20799074 OR 20721530 OR 20716368 OR 20716083 OR 20714760 OR 20713642 OR 20712568 OR 20705450 OR 20704552 OR 20702082 OR 20700747 OR 20696738 OR 20693877 OR 20693854 OR 20693153 OR 20687093 OR 20667323 OR 20664090 OR 20663315 OR 20663183 OR 20661679 OR 20661206 OR 20659133 OR 20658909 OR 20658111 OR 20650595 OR 20649102 OR 20647816 OR 20647815 OR 20647813 OR 20646904 OR 20646405 OR 20639752 OR 20637526 OR 20637406 OR 20636838 OR 20633284 OR 20631393 OR 20628719 OR 20628589 OR 20625922 OR 20623785 OR 20622733 OR 20621953 OR 20619053 OR 20618250 OR 20616646 OR 20614430 OR 20614248 OR 20611003 OR 20608557 OR 20601866 OR 20597366 OR 20596798 OR 20584665 OR 20568833 OR 20562704 OR 20558628 OR 20556683 OR 20549420 OR 20546973 OR 20543481 OR 20528724 OR 20525660 OR 20525656 OR 20525646 OR 20524920 OR 20517725 OR 20513222 OR 20513213 OR 20507948 OR 20507748 OR 20507667 OR 20507662 OR 20507238 OR 20502867 OR 20501811 OR 20497021 OR 20491345 OR 20484349 OR 20483951 OR 20482918 OR 20480533 OR 20476871 OR 20473258 OR 20473257 OR 20473001 OR 20472995 OR 20460547 OR 20454941 OR 20450824 OR 20450633 OR 20442122 OR 20440849 OR 20436311 OR 20427969 OR 20427968 OR 20426988 OR 20093862 OR 20420733 OR 20418714 OR 20418253 OR 20417342 OR 20406086 OR 20405469 OR 20400618 OR 20400251 OR 20398574 OR 20386295 OR 20382284 OR 20380337 OR 20379621 OR 20378369 OR 20378236 OR 20376428 OR 20371522 OR 20370862 OR 20369775 OR 20367910 OR 20367909 OR 20367908 OR 20367904 OR 20367897 OR 20367227 OR 20363428 OR 20352192 OR 20349751 OR 20338893 OR 20335386 OR 20334609 OR 20333352 OR 20302988 OR 20236454 OR 20233575 OR 20232047 OR 20232037 OR 20224063 OR 20220433 OR 20215607 OR 20215606 OR 20215605 OR 20208037 OR 20203241 OR 20199638 OR 20197538 OR 20197533 OR 20197525 OR 20196887 OR 20196876 OR 20196717 OR 20196324 OR 20195404 OR 20190478 OR 20188857 OR 20186475 OR 20182367 OR 20181575 OR 20180828 OR 20179505 OR 20177660 OR 20173631 OR 20168156 OR 20159283 OR 20159282 OR 20159281 OR 20159280 OR 20154600 OR 20151530 OR 20149584 OR 20145532 OR 20145509 OR 20137663 OR 20137593 OR 20130831 OR 20130830 OR 20130829 OR 20125207 OR 20118943 OR 20118487 OR 20116970 OR 20105343 OR 20105342 OR 20105341 OR 20103221 OR 20103220 OR 20102330 OR 20097448 OR 20096024 OR 20093644 OR 20088831 OR 20082167 OR 20081602 OR 20075267 OR 20074908 OR 20063134 OR 20055272 OR 20054760 OR 20049471 OR 20045369 OR 20044274 OR 22767562 OR 21449134 OR 20040127 OR 20040123 OR 20036926 OR 20036070 OR 20035216 OR 20023479 OR 20019160 OR 20017915 OR 20017898 OR 20016420 OR 20014602 OR 20012912 OR 20011943 OR 20010123 OR 20009670 OR 19998228 OR 19958895 OR 19958884 OR 19955544 OR 19954486 OR 19954004 OR 19954002 OR 19953875 OR 19912125 OR 19912120 OR 19953658 OR 19953043 OR 19952736 OR 19952735 OR 19950745 OR 19944056 OR 19940827 OR 19940826 OR 19938716 OR 19935123 OR 19935063 OR 19933372 OR 19930405 OR 19926983 OR 19924393 OR 19923955 OR 19923518 OR 19923403 OR 19922828 OR 19921147 OR 19916052 OR 19910610 OR 19909826 OR 19907932 OR 19903926 OR 19903918 OR 19901662 OR 19897776 OR 19896387 OR 19896324 OR 19895958 OR 19895952 OR 19885995 OR 19878102 OR 22685743 OR 19865011 OR 19854543 OR 19851148 OR 19851091 OR 19846416 OR 19846016 OR 19846009 OR 19846008 OR 19846007 OR 19841483 OR 19841457 OR 19826265 OR 19822628 OR 19821829 OR 19821813 OR 19820915 OR 19820408 OR 19820238 OR 19804634 OR 19801579 OR 19799067 OR 19796422 OR 19789855 OR 19789451 OR 19788026 OR 19784543 OR 19783112 OR 19775467 OR 19768656 OR 19762775 OR 19760204 OR 19756508 OR 19753107 OR 19741490 OR 19741487 OR 19730254 OR 19724065 OR 19722073 OR 19720682 OR 19714518 OR 19713451 OR 19707114 OR 19700048 OR 19699141 OR 19687659 OR 19685056 OR 19683402 OR 19680824 OR 19670780 OR 19667883 OR 19652953 OR 19652952 OR 19649399 OR 19636275 OR 19635219 OR 19635217 OR 19632862 OR 19617309 OR 19617228 OR 19615131 OR 19615130 OR 19615128 OR 19615125 OR 19609249 OR 19609130 OR 19606570 OR 19584643 OR 19584221 OR 19579562 OR 19577642 OR 19577093 OR 19567550 OR 19567548 OR 19560160 OR 19558741 OR 19558735 OR 19558732 OR 19558045 OR 19542479 OR 19531940 OR 19530480 OR 19526757 OR 19526219 OR 19526218 OR 19519946 OR 19514584 OR 19359961 OR 19506468 OR 19497992 OR 19497704 OR 19494493 OR 19487982 OR 19487934 OR 19487932 OR 19487931 OR 19480645 OR 19479195 OR 19476825 OR 19475349 OR 19474216 OR 19473627 OR 19464876 OR 19460555 OR 19453588 OR 19451484 OR 19448491 OR 19448464 OR 19445449 OR 19444574 OR 19442558 OR 19440058 OR 19439687 OR 19439321 OR 19434044 OR 19434040 OR 19422407 OR 19421666 OR 19412147 OR 19411291 OR 19409089 OR 19407940 OR 19407329 OR 19406087 OR 19406086 OR 19403223 OR 19400492 OR 19392733 OR 19384216 OR 19384203 OR 19383994 OR 19379931 OR 19379167 OR 19374794 OR 19374751 OR 19373455 OR 19373049 OR 19373048 OR 19370647 OR 19367529 OR 19362409 OR 19361945 OR 19356342 OR 19347330 OR 19327863 OR 19327320 OR 19325471 OR 19325470 OR 19321323 OR 19318861 OR 19318859 OR 19305053 OR 19304566 OR 19299795 OR 19299049 OR 19298933 OR 19295479 OR 19295253 OR 19272548 OR 19272544 OR 19272543 OR 19269800 OR 19268802 OR 19260559 OR 19260113 OR 19255741 OR 19254644 OR 19252234 OR 19251942 OR 19218673 OR 19218632 OR 19239703 OR 19238674 OR 19238673 OR 19238672 OR 19237964 OR 19228629 OR 19226296 OR 19210772 OR 19202383 OR 19201702 OR 19199225 OR 19194147 OR 19194146 OR 19188556 OR 19188269 OR 19186522 OR 19186410 OR 19183475 OR 19175577 OR 19174745 OR 19171123 OR 19163299 OR 19151194 OR 19144052 OR 19144044 OR 19143699 OR 19132444 OR 19131754 OR 19131753 OR 19131747 OR 19125232 OR 19118154 OR 19103612 OR 19099321 OR 19087678 OR 19080320 OR 19080287 OR 19078843 OR 19074576 OR 19060765 OR 19060746 OR 19060729 OR 19059966 OR 19059159 OR 19059093 OR 19059091 OR 19054296 OR 19050631 OR 19048528 OR 19043011 OR 19043007 OR 19041527 OR 19035699 OR 19033775 OR 19025701 OR 19025696 OR 19021087 OR 19021086 OR 19016390 OR 19016388 OR 19016387 OR 19016386 OR 19010979 OR 19002049 OR 19001507 OR 19001506 OR 18993042 OR 18981451 OR 18975590 OR 18974252 OR 18974251 OR 18974237 OR 18957146 OR 18956178 OR 18953957 OR 18947396 OR 18946952 OR 18946661 OR 18946660 OR 18931981 OR 18926075 OR 18926068 OR 18923347 OR 18853594 OR 18849139 OR 18846041 OR 18842922 OR 18838927 OR 18828271 OR 18827716 OR 18827149 OR 18824913 OR 18820119 OR 18812805 OR 18812803 OR 18812799 OR 18812792 OR 18810582 OR 18807902 OR 18807893 OR 18807374 OR 18805857 OR 18804848 OR 18790185 OR 18766113 OR 18766107 OR 18766100 OR 18766099 OR 18766087 OR 18762408 OR 18757451 OR 18728503 OR 18728502 OR 18728499 OR 18728491 OR 18728474 OR 18725036 OR 18713850 OR 18710624 OR 18706194 OR 18705470 OR 18705309 OR 18695699 OR 18695477 OR 18695281 OR 18693660 OR 18692287 OR 18691048 OR 18690927 OR 18689600 OR 18689599 OR 18689583 OR 18689581 OR 18687300 OR 18682041 OR 18679148 OR 18676962 OR 18671181 OR 18670760 OR 18669784 OR 18664809 OR 18664808 OR 18664801 OR 18664791 OR 18662425 OR 18658275 OR 18656058 OR 18652109 OR 18650573 OR 18648769 OR 18645360 OR 18645358 OR 18640306 OR 18629471 OR 18628231 OR 18617313 OR 18610854 OR 18607685 OR 18601841 OR 18601838 OR 18599254 OR 18598382 OR 18596639 OR 18596631 OR 18595649 OR 18594237 OR 18594231 OR 18594037 OR 18594036 OR 18594035 OR 18594034 OR 18594033 OR 18593501 OR 18593489 OR 18593486 OR 18592993 OR 18591913 OR 18591858 OR 18591348 OR 18589176 OR 18587419 OR 18585000 OR 18580520 OR 18575846 OR 18574291 OR 18570836 OR 18566110 OR 18565951 OR 18565719 OR 18563675 OR 18563674 OR 18563673 OR 18563672 OR 18556623 OR 18555927 OR 18552699 OR 18549715 OR 18549708 OR 18544387 OR 18539636 OR 18535161 OR 18533188 OR 18521628 OR 18520670 OR 18520665 OR 18517018 OR 18513388 OR 18510786 OR 18509925 OR 18508837 OR 18507193 OR 18503973 OR 18503930 OR 18501625 OR 18500418 OR 18500210 OR 18499559 OR 18497605 OR 18497596 OR 18496377 OR 18496365 OR 18495394 OR 18494396 OR 18488933 OR 18484476 OR 18478722 OR 18477071 OR 18472433 OR 18472432 OR 18472431 OR 18472430 OR 18472429 OR 18472428 OR 18472427 OR 18467944 OR 18460218 OR 18457362 OR 18456798 OR 18451319 OR 18450801 OR 18448932 OR 18448929 OR 18448924 OR 18448505 OR 18447931 OR 18442782 OR 18440442 OR 18440438 OR 18440436 OR 18440433 OR 18439931 OR 18438579 OR 18437075 OR 18436790 OR 18436420 OR 18434907 OR 18434890 OR 18434738 OR 18434686 OR 18434379 OR 18434378 OR 18433715 OR 18431313 OR 18431306 OR 18431302 OR 18431279 OR 18431269 OR 18427774 OR 18427093 OR 18427090 OR 18423069 OR 18419718 OR 18418569 OR 18418098 OR 18416847 OR 18416211 OR 18414236 OR 18412646 OR 18411002 OR 18404075 OR 18403322 OR 18401254 OR 18385582 OR 18395641 OR 18394185 OR 18385631 OR 18385299 OR 18385298 OR 18385297 OR 18385294 OR 18380929 OR 18380908 OR 18379279 OR 18379271 OR 18379266 OR 18379249 OR 18379248 OR 18379247 OR 18379236 OR 18379227 OR 18378634 OR 18373323 OR 18372350 OR 18369574 OR 18368145 OR 18365174 OR 18361004 OR 18360979 OR 18360148 OR 18359427 OR 18356564 OR 18356562 OR 18353235 OR 18351183 OR 18341706 OR 18340998 OR 18340535 OR 18339021 OR 18328478 OR 18327361 OR 18326900 OR 18326823 OR 18318262 OR 18315662 OR 18315525 OR 18312626 OR 18310483 OR 18308954 OR 18307675 OR 18307123 OR 18307045 OR 18306860 OR 18296471 OR 18293413 OR 18292677 OR 18292671 OR 18291264 OR 18286832 OR 18283138 OR 18282280 OR 18270360 OR 18270359 OR 18270353 OR 18270352 OR 18264892 OR 18264692 OR 18257742 OR 18256980 OR 18256378 OR 18252932 OR 18251038 OR 18250357 OR 18245073 OR 18243566 OR 18239447 OR 18236729 OR 18236026 OR 18234767 OR 18230636 OR 18230633 OR 18227773 OR 18223674 OR 18218202 OR 18218201 OR 18218200 OR 18218199 OR 18216629 OR 18216628 OR 18216609 OR 18216605 OR 18214441 OR 18214431 OR 18214005 OR 18213733 OR 18212587 OR 18209670 OR 18209669 OR 18205959 OR 18201006 OR 18199848 OR 18197927 OR 18197910 OR 18195631 OR 18195622 OR 18195621 OR 18195620 OR 18195619 OR 18195618 OR 18185131 OR 18182731 OR 18182560 OR 18180905 OR 18179004 OR 18173019 OR 18166944 OR 18166599 OR 18164581 OR 18162202 OR 18159036 OR 18158460 OR 18158457 OR 18158453 OR 18158437 OR 18158142 OR 18156897 OR 18156895 OR 18154817 OR 18094015 OR 18091624 OR 18091573 OR 18091555 OR 18091534 OR 18090375 OR 18090370 OR 18088257 OR 18087691 OR 18087690 OR 18087689 OR 18086397 OR 18086329 OR 18086328 OR 18085359 OR 18084998 OR 18084817 OR 18084125 OR 18082029 OR 18080385 OR 18079496 OR 18077819 OR 18075389 OR 18074482 OR 18074480 OR 18069756 OR 18062893 OR 18055843 OR 18026670 OR 18048584 OR 18043902 OR 18040934 OR 18040932 OR 18039449 OR 18036987 OR 18035170 OR 18034430 OR 18032445 OR 18028953 OR 18028783 OR 18028568 OR 18018549 OR 18005903 OR 18005469 OR 18005383 OR 18001997 OR 18000649 OR 17994369 OR 17993965 OR 17993588 OR 17993000 OR 17989570 OR 17989165 OR 17989163 OR 17988390 OR 17986108 OR 17984489 OR 17984471 OR 17984140 OR 17982091 OR 17979721 OR 17975689 OR 17975389 OR 17676436 OR 17676434 OR 17972121 OR 17971251 OR 17971250 OR 17971249 OR 17971241 OR 17970177 OR 17967295 OR 17967294 OR 17967178 OR 17962921 OR 17962636 OR 17961752 OR 17960364 OR 17959998 OR 17953297 OR 17951278 OR 17950327 OR 17950078 OR 17949914 OR 17944027 OR 17944012 OR 17940748 OR 17939634 OR 17933836 OR 17933042 OR 17925425 OR 17925413 OR 17924476 OR 17919363 OR 17914505 OR 17908660 OR 17902148 OR 17901838 OR 17901416 OR 17901159 OR 17898997 OR 17898390 OR 17889516 OR 17885388 OR 17885381 OR 17884126 OR 17883944 OR 17883616 OR 17879611 OR 17877789 OR 17874973 OR 17873790 OR 17873527 OR 17873212 OR 17873211 OR 17873210 OR 17873209 OR 17873208 OR 17873207 OR 17872593 OR 17870635 OR 17855672 OR 17849249 OR 17825843 OR 17822361 OR 17805492 OR 17803352 OR 17785997 OR 17767828 OR 17767456 OR 17761964 OR 17718922 OR 17718246 OR 17717455 OR 17717368 OR 17715384 OR 17713380 OR 17711969 OR 17711964 OR 17706653 OR 17701858 OR 17698896 OR 17693914 OR 17693905 OR 17693834 OR 17690203 OR 17688881 OR 17688701 OR 17687219 OR 17687196 OR 17684983 OR 17680186 OR 17679007 OR 17679006 OR 17679004 OR 17674097 OR 17673567 OR 17672195 OR 17671778 OR 17671245 OR 17669838 OR 17667256 OR 17667255 OR 17667244 OR 17666113 OR 19209804 OR 17665069 OR 17664639 OR 17664195 OR 17660075 OR 17656676 OR 17654275 OR 17653529 OR 17650693 OR 17638952 OR 17636739 OR 17631984 OR 17629900 OR 17629797 OR 17627322 OR 17626910 OR 17556998 OR 17556976 OR 17622921 OR 17620112 OR 17619505 OR 17616453 OR 17615388 OR 17609236 OR 17596733 OR 17589942 OR 17589383 OR 17588233 OR 17587427 OR 17585106 OR 17581481 OR 17581388 OR 17581363 OR 17581361 OR 17581360 OR 17581271 OR 17578561 OR 17577740 OR 17575384 OR 17574582 OR 17573963 OR 17573490 OR 17573487 OR 17572873 OR 17570085 OR 17568331 OR 17565024 OR 17558469 OR 17557801 OR 17556717 OR 17556627 OR 17551985 OR 17547569 OR 17546551 OR 17545937 OR 17543939 OR 17543666 OR 17542769 OR 17537058 OR 17532988 OR 17530222 OR 17526186 OR 17525842 OR 17525601 OR 17525599 OR 17525581 OR 17524101 OR 17522583 OR 17522576 OR 17522547 OR 17522540 OR 17522538 OR 17521103 OR 17520822 OR 17516448 OR 17516084 OR 17515848 OR 17515712 OR 17515093 OR 17508092 OR 17507824 OR 17506160 OR 17495746 OR 17495742 OR 17495725 OR 17493609 OR 17493273 OR 17488410 OR 17488224 OR 17487769 OR 17484794 OR 17484793 OR 17484791 OR 17484788 OR 17482987 OR 17470757 OR 17470208 OR 17468569 OR 17467319 OR 17466082 OR 17465501 OR 17460144 OR 17458645 OR 17457125 OR 17455139 OR 17448315 OR 17444322 OR 17441473 OR 17440422 OR 17440420 OR 17440419 OR 17440332 OR 17439768 OR 17439419 OR 17439026 OR 17438902 OR 17436775 OR 17434327 OR 17433389 OR 17433185 OR 17432024 OR 17431232 OR 17429327 OR 17426542 OR 17426195 OR 17426190 OR 17425618 OR 17421113 OR 17421093 OR 17419435 OR 17417981 OR 17417980 OR 17416504 OR 17414422 OR 17404282 OR 17404281 OR 17400256 OR 17396026 OR 17384569 OR 17384568 OR 17383982 OR 17381617 OR 17381611 OR 17381610 OR 17381535 OR 17381402 OR 17380103 OR 17379996 OR 17378527 OR 17377767 OR 17368173 OR 17368172 OR 17368171 OR 17368169 OR 17368168 OR 17368165 OR 17368163 OR 17368161 OR 17368160 OR 17356115 OR 17356114 OR 17356085 OR 17352801 OR 17352671 OR 17351437 OR 17351059 OR 17348877 OR 17348874 OR 17347182 OR 17338932 OR 17330265 OR 17329067 OR 17327996 OR 17327995 OR 17326973 OR 17324147 OR 17323672 OR 17323049 OR 17322110 OR 17320605 OR 17320009 OR 17318498 OR 17316187 OR 17313916 OR 17313668 OR 17313364 OR 17312463 OR 17309528 OR 17307813 OR 17307811 OR 17307785 OR 17302983 OR 17300303 OR 17299604 OR 17297323 OR 17296631 OR 17294835 OR 17289334 OR 17288265 OR 17288264 OR 17287298 OR 17285413 OR 17284305 OR 17278232 OR 17275845 OR 17275486 OR 17268795 OR 17261192 OR 17256222 OR 17255878 OR 17255855 OR 17255773 OR 17252227 OR 17251723 OR 17244914 OR 17243313 OR 17242128 OR 17236325 OR 17233397 OR 17221187 OR 17219196 OR 17218595 OR 17218578 OR 17216512 OR 17215740 OR 17214279 OR 17213736 OR 17212028 OR 17205026 OR 17205023 OR 17204030 OR 17201082 OR 17200505 OR 17198053 OR 17198047 OR 17198042 OR 17197791 OR 17197775 OR 17197774 OR 17197769 OR 17197766 OR 17192526 OR 17187683 OR 17184652 OR 17184651 OR 17184554 OR 17181668 OR 17177318 OR 17176860 OR 17175749 OR 17173364 OR 17168983 OR 17168403 OR 17166350 OR 17166348 OR 17166345 OR 17166344 OR 17164019 OR 17161427 OR 17156230 OR 17153538 OR 17150431 OR 17150053 OR 17147862 OR 17143330 OR 17141778 OR 17140974 OR 17136846 OR 17133522 OR 17133185 OR 17133177 OR 17130712 OR 17130707 OR 17130694 OR 17122967 OR 17121051 OR 17120148 OR 17110875 OR 17110872 OR 17106942 OR 17102908 OR 17099616 OR 17093370 OR 17092413 OR 17091244 OR 17089316 OR 17089236 OR 17087844 OR 17087341 OR 17086464 OR 17085749 OR 17085351 OR 17085259 OR 17085258 OR 17085257 OR 17085254 OR 17085253 OR 17085252 OR 17085251 OR 17085250 OR 17085249 OR 17085245 OR 17084725 OR 17083780 OR 17075373 OR 17074270 OR 17067505 OR 17067478 OR 17065023 OR 17058834 OR 17058665 OR 17057606 OR 17056958 OR 17053573 OR 17053457 OR 17049438 OR 17047926 OR 17047925 OR 17047924 OR 17045404 OR 17043380 OR 17042905 OR 17038660 OR 17036409 OR 17033549 OR 17021992 OR 17021356 OR 17019545 OR 17019544 OR 17019320 OR 17018505 OR 17015742 OR 17013497 OR 17011912 OR 17005059 OR 17005058 OR 17003615 OR 16990613 OR 16989741 OR 16983993 OR 16983286 OR 16978315 OR 16977703 OR 16977702 OR 16971727 OR 16969233 OR 16965569 OR 16963669 OR 16959149 OR 16957904 OR 16957822 OR 16957635 OR 16955131 OR 16953164 OR 16952880 OR 16952807 OR 16952806 OR 16952803 OR 16952802 OR 16952799 OR 16952798 OR 16952797 OR 16951278 OR 16948187 OR 16948186 OR 16943411 OR 16941167 OR 16936359 OR 16934131 OR 16932229 OR 16931645 OR 16930140 OR 16930105 OR 16928710 OR 16928559 OR 16924442 OR 16922808 OR 16921333 OR 16921322 OR 16921319 OR 16914463 OR 16913178 OR 16910477 OR 16909376 OR 16909375 OR 16909374 OR 16909373 OR 16909371 OR 16909369 OR 16909368 OR 16909292 OR 16904925 OR 16902842 OR 16899837 OR 16896846 OR 16891686 OR 16887102 OR 16885792 OR 16885789 OR 16884556 OR 16884462 OR 16880057 OR 16879722 OR 16878020 OR 16875090 OR 16874497 OR 16871629 OR 16867091 OR 16866645 OR 16860628 OR 16858838 OR 16858837 OR 16858836 OR 16858835 OR 16856289 OR 16856285 OR 16855277 OR 16855276 OR 16850740 OR 16850002 OR 16846845 OR 16840387 OR 16830126 OR 16828693 OR 16824339 OR 16822468 OR 16819349 OR 16804770 OR 16798202 OR 16794838 OR 16794510 OR 16794498 OR 16792793 OR 16791681 OR 16791109 OR 16788388 OR 16784564 OR 16784557 OR 16780088 OR 16779747 OR 16769470 OR 16769455 OR 16766251 OR 16766250 OR 16766249 OR 16764731 OR 16763220 OR 16761427 OR 16761421 OR 16760359 OR 16757373 OR 16749915 OR 16740174 OR 16739906 OR 16738496 OR 16738493 OR 16738043 OR 16732896 OR 16730448 OR 16728851 OR 16723252 OR 16717322 OR 16715011 OR 16714998 OR 16714996 OR 16714914 OR 16714770 OR 16714769 OR 16714768 OR 16714767 OR 16714689 OR 16708806 OR 16702319 OR 16698854 OR 16690982 OR 16689819 OR 16688053 OR 16687790 OR 16685673 OR 16682903 OR 16682901 OR 16678394 OR 16677452 OR 16675226 OR 16672641 OR 16672636 OR 16648240 OR 16645177 OR 16641401 OR 16641394 OR 16638654 OR 16637428 OR 16634834 OR 16633274 OR 16633257 OR 16633256 OR 16633254 OR 16633248 OR 16632865 OR 16632636 OR 16625121 OR 16625116 OR 16625013 OR 16625008 OR 16617258 OR 16617254 OR 16616763 OR 16616620 OR 16612457 OR 16612308 OR 16607229 OR 16606436 OR 16604039 OR 16603026 OR 16580256 OR 16572737 OR 16562685 OR 16557151 OR 16557033 OR 16556697 OR 16555723 OR 16554988 OR 16553597 OR 16552667 OR 16550105 OR 16550094 OR 16550085 OR 16548446 OR 16547426 OR 16546837 OR 16543794 OR 16543789 OR 16542488 OR 16540960 OR 16540950 OR 16540949 OR 16539706 OR 16535928 OR 16531376 OR 16527149 OR 16522769 OR 16522768 OR 16521285 OR 16521268 OR 16520493 OR 16516435 OR 16514111 OR 16508399 OR 16507176 OR 16507163 OR 16505700 OR 16505662 OR 16504535 OR 16499105 OR 16494603 OR 16494602 OR 16493388 OR 16491388 OR 16490992 OR 16489639 OR 16489578 OR 16484924 OR 16484911 OR 16484896 OR 16477430 OR 16475639 OR 16471076 OR 16469204 OR 16463830 OR 16463532 OR 16454231 OR 16451123 OR 16445696 OR 16441359 OR 16440205 OR 16436367 OR 16432678 OR 16432624 OR 16432122 OR 16425061 OR 16424761 OR 16424753 OR 16424741 OR 16424730 OR 16424706 OR 16424423 OR 16423267 OR 16421669 OR 16420663 OR 16420654 OR 16420652 OR 16417989 OR 16416684 OR 16415323 OR 16409721 OR 16394785 OR 16394784 OR 16394783 OR 16394781 OR 16394780 OR 16394779 OR 16394778 OR 16394776 OR 16391721 OR 16387688 OR 16386871 OR 16374199 OR 16374187 OR 16374183 OR 16374181 OR 16374180 OR 16374174 OR 16374160 OR 16374157 OR 16374152 OR 16374150 OR 16374149 OR 16371634 OR 16371618 OR 16370933 OR 16368834 OR 16361929 OR 16361299 OR 16357710 OR 16356246 OR 16356227 OR 16352797 OR 16344201 OR 16340376 OR 16340367 OR 16338455 OR 16328222 OR 16328218 OR 16324272 OR 16318643 OR 16318639 OR 16317391 OR 16315529 OR 16312207 OR 16307948 OR 16306059 OR 16306054 OR 16304249 OR 16304246 OR 16299045 OR 16297809 OR 16297326 OR 16294072 OR 16288359 OR 16287215 OR 16285116 OR 16284739 OR 16283163 OR 16283161 OR 16280061 OR 16278352 OR 16277736 OR 16277735 OR 16277726 OR 16276342 OR 16276338 OR 16276222 OR 16276205 OR 16276200 OR 16276193 OR 16276187 OR 16276185 OR 16276179 OR 16275622 OR 16271479 OR 16268924 OR 16268323 OR 16263477 OR 16263476 OR 16259399 OR 16258347 OR 16254269 OR 16252223 OR 16249926 OR 16244522 OR 16243331 OR 16237276 OR 16235549 OR 16231069 OR 16229707 OR 16227921 OR 16224149 OR 16223164 OR 16222039 OR 16222036 OR 16222035 OR 16218237 OR 16217166 OR 16215423 OR 16215415 OR 16215412 OR 16215399 OR 16215386 OR 16215365 OR 16215347 OR 16210115 OR 16207862 OR 16207430 OR 16206417 OR 16205320 OR 16199150 OR 16196302 OR 16195903 OR 16194514 OR 16189046 OR 16183710 OR 16182823 OR 16181214 OR 16177920 OR 16177919 OR 16176765 OR 16164735 OR 16156317 OR 16155753 OR 16153445 OR 16151446 OR 16141683 OR 16139162 OR 16138238 OR 16137379 OR 16137357 OR 16137187 OR 16137054 OR 16136966 OR 16131795 OR 16131559 OR 16128368 OR 16124899 OR 16122625 OR 16118378 OR 16115537 OR 16114570 OR 16109982 OR 16105429 OR 16105428 OR 16105427 OR 16105425 OR 16105424 OR 16105422 OR 16104494 OR 16100012 OR 16096750 OR 16096541 OR 16096539 OR 16096492 OR 16096466 OR 16096460 OR 16096441 OR 16096351 OR 16091965 OR 16086061 OR 16083313 OR 16081548 OR 16081547 OR 16078298 OR 16076048 OR 16076041 OR 16075739 OR 16075718 OR 16075254 OR 16060878 OR 16053946 OR 16052273 OR 16047289 OR 16042959 OR 16040787 OR 16034030 OR 16032424 OR 16027523 OR 16021388 OR 16020801 OR 16018365 OR 16015518 OR 16014601 OR 16014597 OR 16013206 OR 16003061 OR 16002946 OR 15999256 OR 15995487 OR 15987415 OR 15987411 OR 15987398 OR 15987392 OR 15981863 OR 15981846 OR 15974469 OR 15973521 OR 15970103 OR 15970090 OR 15967733 OR 15957716 OR 15953745 OR 15949945 OR 15944428 OR 15942392 OR 15942367 OR 15942363 OR 15942332 OR 15942330 OR 15938734 OR 15937067 OR 15928475 OR 15926869 OR 15919677 OR 15912074 OR 15910727 OR 15907908 OR 15906924 OR 15902629 OR 15902589 OR 15896507 OR 15896346 OR 15894508 OR 15891369 OR 15891361 OR 15891351 OR 15891350 OR 15891342 OR 15891329 OR 15891327 OR 15891315 OR 15887591 OR 15886587 OR 15886585 OR 15874891 OR 15868546 OR 15868538 OR 15864960 OR 15857535 OR 15857229 OR 15857169 OR 15856130 OR 15853730 OR 15852989 OR 15852432 OR 15851904 OR 15849841 OR 15846674 OR 15838267 OR 15836693 OR 15832971 OR 15830771 OR 15830325 OR 15821216 OR 15818502 OR 15818128 OR 15818127 OR 15818113 OR 15818103 OR 15818093 OR 15816597 OR 15813666 OR 15812622 OR 15811166 OR 15808124 OR 15806066 OR 15804162 OR 15803293 OR 15802172 OR 15792950 OR 15785826 OR 15778497 OR 15774279 OR 15774075 OR 15774062 OR 15774053 OR 15774050 OR 15773424 OR 15767234 OR 15766621 OR 15763380 OR 15757887 OR 15754196 OR 15753762 OR 15753743 OR 15753735 OR 15753734 OR 15753733 OR 15753732 OR 15753730 OR 15753729 OR 15753728 OR 15753726 OR 15753725 OR 15753724 OR 15753718 OR 15753715 OR 15752401 OR 15751810 OR 15750045 OR 15748091 OR 15739638 OR 15738300 OR 15737107 OR 15731892 OR 15730729 OR 15728072 OR 15722387 OR 15719857 OR 15719150 OR 15717509 OR 15717508 OR 15717186 OR 15715623 OR 15715619 OR 15714396 OR 15710155 OR 15708656 OR 15707856 OR 15707822 OR 15707353 OR 15706022 OR 15706016 OR 15700545 OR 15699858 OR 15699840 OR 15695553 OR 15693985 OR 15691393 OR 15684729 OR 15683852 OR 15683112 OR 15681391 OR 15680804 OR 15678318 OR 15676088 OR 15673601 OR 15671432 OR 15668765 OR 15665322 OR 15665259 OR 15659948 OR 15659947 OR 15659946 OR 15659941 OR 15659940 OR 15655351 OR 15650994 OR 15650866 OR 15648997 OR 15644681 OR 15644654 OR 15644650 OR 15644648 OR 15644644 OR 15644641 OR 15644425 OR 15644035 OR 15644034 OR 15640644 OR 15640370 OR 15638129 OR 15636649 OR 15635045 OR 15631924 OR 15629865 OR 15628648 OR 15625275 OR 15616405 OR 15616401 OR 15616399 OR 15615107 OR 15609705 OR 15606221 OR 15605831 OR 15605230 OR 15603721 OR 15602030 OR 15601356 OR 15599174 OR 15599172 OR 15599163 OR 15599162 OR 15599153 OR 15599139 OR 15599138 OR 15597800 OR 15591935 OR 15590431 OR 15585140 OR 15580020 OR 15580017 OR 15578996 OR 15576632 OR 15574555 OR 15573717 OR 15567677 OR 15566621 OR 15566614 OR 15566603 OR 15566597 OR 15562926 OR 15557685 OR 15554940 OR 15551894 OR 15551507 OR 15549997 OR 15543660 OR 15542963 OR 15542793 OR 15537913 OR 15537121 OR 15533951 OR 15524403 OR 15521615 OR 15515216 OR 15514555 OR 15507166 OR 15500109 OR 15498268 OR 15495113 OR 15495062 OR 15494205 OR 15491782 OR 15490076 OR 15486394 OR 15486357 OR 15484180 OR 15483418 OR 15481446 OR 15480780 OR 15480046 OR 15478542 OR 15477499 OR 15477122 OR 15469597 OR 15469586 OR 15469573 OR 15468562 OR 15468561 OR 15467336 OR 15466151 OR 15466148 OR 15461848 OR 15461837 OR 15458731 OR 15458730 OR 15458729 OR 15458728 OR 15454800 OR 15454797 OR 15453568 OR 15453393 OR 15448887 OR 15388218 OR 15388190 OR 15388003 OR 15384697 OR 15383787 OR 15383020 OR 15381531 OR 15381520 OR 15377644 OR 15375648 OR 15373862 OR 15373658 OR 15372177 OR 15372148 OR 15371093 OR 15365606 OR 15364791 OR 15364765 OR 15363258 OR 15359205 OR 15358390 OR 15358381 OR 15353441 OR 15351933 OR 15351300 OR 15345991 OR 15345878 OR 15343028 OR 15343027 OR 15343021 OR 15343015 OR 15343007 OR 15340694 OR 15340237 OR 15333424 OR 15329586 OR 15329426 OR 15329420 OR 15329177 OR 15329175 OR 15329172 OR 15329171 OR 15329170 OR 15321772 OR 15319840 OR 15318473 OR 15317670 OR 15314887 OR 15312828 OR 15312408 OR 15312205 OR 15308058 OR 15304409 OR 15303506 OR 15302748 OR 15302739 OR 15298545 OR 15293436 OR 15286546 OR 15281529 OR 15277297 OR 15276135 OR 15269320 OR 15269312 OR 15265844 OR 15265772 OR 15264747 OR 15264725 OR 15261079 OR 15258499 OR 15258498 OR 15257405 OR 15257087 OR 15252958 OR 15242856 OR 15241708 OR 15241129 OR 15241115 OR 15241111 OR 15241094 OR 15241090 OR 15241088 OR 15239543 OR 15238183 OR 15238178 OR 15238174 OR 15238170 OR 15225911 OR 15223462 OR 15222911 OR 15221129 OR 15221117 OR 15220794 OR 15216910 OR 15216907 OR 15215011 OR 15212340 OR 15208970 OR 15201135 OR 15200186 OR 15198234 OR 15197952 OR 15196336 OR 15196112 OR 15196105 OR 15194621 OR 15192761 OR 15192007 OR 15190990 OR 15190959 OR 15189663 OR 15187753 OR 15187556 OR 15187508 OR 15187503 OR 15185067 OR 15182457 OR 15179139 OR 15175271 OR 15174605 OR 15168010 OR 15167016 OR 15166847 OR 15166845 OR 15166844 OR 15166843 OR 15165299 OR 15154995 OR 15153234 OR 15153229 OR 15148453 OR 15145838 OR 15136292 OR 15132478 OR 15127186 OR 15124037 OR 15123232 OR 15121827 OR 15117127 OR 15115870 OR 15113380 OR 15109200 OR 15106625 OR 15106223 OR 15106222 OR 15106020 OR 15101213 OR 15101006 OR 15090994 OR 15090987 OR 15090960 OR 15090958 OR 15082290 OR 15078770 OR 15078761 OR 15077717 OR 15077226 OR 15073718 OR 15071416 OR 15071409 OR 15071401 OR 15071387 OR 15071383 OR 15069052 OR 15069048 OR 15068054 OR 15062468 OR 15054570 OR 15053818 OR 15052382 OR 15049218 OR 15048162 OR 15037267 OR 15029624 OR 15029473 OR 15025772 OR 15025770 OR 15022809 OR 15020292 OR 15019133 OR 15013832 OR 15012896 OR 15011430 OR 15002070 OR 14999531 OR 14999396 OR 14998227 OR 14997901 OR 14997291 OR 14997290 OR 14996693 OR 14996675 OR 14994569 OR 14991979 OR 14991195 OR 14991190 OR 14991097 OR 14991096 OR 14991092 OR 14991090 OR 14991084 OR 14989815 OR 14985965 OR 14985954 OR 14984068 OR 14984067 OR 14984066 OR 14984065 OR 14984064 OR 14984063 OR 14982648 OR 14982647 OR 14982646 OR 14982560 OR 14982559 OR 14982557 OR 14980292 OR 14980277 OR 14979331 OR 14975042 OR 14975037 OR 14974056 OR 14972232 OR 14963945 OR 14962337 OR 14962336 OR 14764430 OR 14761872 OR 14761450 OR 14758168 OR 14760419 OR 14752669 OR 14752179 OR 14744400 OR 14740592 OR 14739807 OR 14738246 OR 14735237 OR 14731358 OR 14728830 OR 14727019 OR 14724466 OR 14723378 OR 14722644 OR 14722629 OR 14722191 OR 14722184 OR 14722180 OR 14720072 OR 14720025 OR 14720000 OR 14719846 OR 14718238 OR 14716476 OR 14710689 OR 14709467 OR 14708914 OR 14708832 OR 14707608 OR 14707600 OR 14707588 OR 14707581 OR 14707572 OR 14707569 OR 14707568 OR 14705678 OR 19785216 OR 14701713 OR 14700158 OR 14700004 OR 14695106 OR 14695104 OR 14693669 OR 14690071 OR 14690070 OR 14690069 OR 14690068 OR 14688036 OR 14680089 OR 14674352 OR 14674223 OR 14674221 OR 14674220 OR 14668626 OR 14668619 OR 14668618 OR 14668614 OR 14668608 OR 14668607 OR 14668251 OR 14665513 OR 14665511 OR 14656749 OR 14653968 OR 14653965 OR 14653963 OR 14653959 OR 14647711 OR 14646457 OR 14645317 OR 14645314 OR 14644926 OR 14643171 OR 14642794 OR 14639985 OR 14639076 OR 14635626 OR 14635625 OR 14635498 OR 14627798 OR 14625716 OR 14624671 OR 14608459 OR 14607702 OR 14606162 OR 14606154 OR 14605550 OR 14605547 OR 14605535 OR 14605531 OR 14605529 OR 14604487 OR 14604485 OR 14601715 OR 14586495 OR 14582052 OR 14582051 OR 14580923 OR 14580048 OR 14578214 OR 14577069 OR 14574667 OR 14571608 OR 14571393 OR 14569423 OR 14566457 OR 14559695 OR 14557856 OR 14530761 OR 14529979 OR 14524023 OR 14520937 OR 14517598 OR 14511236 OR 14509929 OR 14506791 OR 14504727 OR 14504066 OR 14503050 OR 14502367 OR 14501968 OR 14501967 OR 14501520 OR 14501491 OR 13680122 OR 12974971 OR 12974963 OR 12973973 OR 12973168 OR 12963497 OR 12962589 OR 12958048 OR 12955187 OR 12955175 OR 12954812 OR 12954792 OR 12953390 OR 12952271 OR 12950134 OR 12949024 OR 12946005 OR 12946002 OR 12946001 OR 12946000 OR 12945999 OR 12945997 OR 12945996 OR 12945994 OR 12941657 OR 12940630 OR 12939114 OR 12929592 OR 12925483 OR 12924981 OR 12923623 OR 12923622 OR 12923619 OR 12923616 OR 12917991 OR 12917298 OR 12913639 OR 12911829 OR 12911354 OR 12911166 OR 12910335 OR 12907562 OR 12907525 OR 12904858 OR 12902211 OR 12897997 OR 12897993 OR 12892614 OR 12891497 OR 12891083 OR 12890294 OR 12885704 OR 12883288 OR 12882643 OR 12882464 OR 12882446 OR 12879246 OR 12879234 OR 12879233 OR 12878634 OR 12877652 OR 12876085 OR 12871966 OR 12865644 OR 12865383 OR 12865379 OR 12865378 OR 12859432 OR 12859307 OR 12857723 OR 12857483 OR 12856654 OR 12855776 OR 12853595 OR 12853535 OR 12853533 OR 12851763 OR 12850461 OR 12850124 OR 12847394 OR 12847327 OR 12847272 OR 12844025 OR 12842856 OR 12837170 OR 12837168 OR 12827238 OR 12821573 OR 12816032 OR 12815791 OR 12815115 OR 12812667 OR 12808320 OR 12796056 OR 12796049 OR 12795139 OR 12794447 OR 12794446 OR 12794432 OR 12794427 OR 12794407 OR 12794395 OR 12793886 OR 12793874 OR 12793868 OR 12793866 OR 12793624 OR 12793620 OR 12791086 OR 12790814 OR 12789638 OR 12783290 OR 12781863 OR 12781621 OR 12780948 OR 12774161 OR 12771616 OR 12771605 OR 12771598 OR 12770857 OR 12770856 OR 12770853 OR 12768313 OR 12768236 OR 12766707 OR 12764169 OR 12756964 OR 12756882 OR 12754185 OR 12749650 OR 12749307 OR 12748321 OR 12747964 OR 12740242 OR 12740234 OR 12738592 OR 12734647 OR 12733492 OR 12730073 OR 12728461 OR 12720568 OR 12720567 OR 12720551 OR 12714343 OR 12712231 OR 12709468 OR 12708260 OR 12708084 OR 12699507 OR 12697582 OR 12696451 OR 12694159 OR 12690438 OR 12682565 OR 12682516 OR 12682489 OR 12682479 OR 12682462 OR 12682461 OR 12682460 OR 12682459 OR 12682458 OR 12682457 OR 12682456 OR 12682449 OR 12682437 OR 12685891 OR 12672870 OR 12672866 OR 12666000 OR 12665164 OR 12663342 OR 12663341 OR 12663340 OR 12663326 OR 12662007 OR 12661988 OR 12661116 OR 12653676 OR 12653110 OR 12653109 OR 12653108 OR 12649125 OR 12648200 OR 12647235 OR 12645111 OR 12640616 OR 12635332 OR 12635141 OR 12634987 OR 12628890 OR 12628887 OR 12627020 OR 12627017 OR 12626981 OR 12626977 OR 12626925 OR 12626333 OR 12625173 OR 12623861 OR 12623617 OR 12617741 OR 12615633 OR 12615628 OR 12615617 OR 12612546 OR 12612443 OR 12607473 OR 12605592 OR 12599685 OR 12598221 OR 12598216 OR 12598212 OR 12595980 OR 12594585 OR 12594156 OR 12591482 OR 12589529 OR 12588712 OR 12587967 OR 12585830 OR 12583376 OR 12580165 OR 12579059 OR 12579058 OR 12576981 OR 12576979 OR 12576957 OR 12576945 OR 12576940 OR 12574072 OR 12562153 OR 12559881 OR 12558304 OR 12554902 OR 12553498 OR 12548027 OR 12548026 OR 12548025 OR 12548024 OR 12545048 OR 12545042 OR 12545020 OR 12545013 OR 12544999 OR 12544975 OR 12544907 OR 12544904 OR 12544421 OR 12541161 OR 12536272 OR 12535438 OR 12534123 OR 12533442 OR 12533061 OR 12528034 OR 12525352 OR 12524908 OR 12523582 OR 12522733 OR 12517997 OR 12512209 OR 12505870 OR 12503477 OR 12502483 OR 12493646 OR 12493644 OR 12493078 OR 12493069 OR 12483058 OR 12481820 OR 12481818 OR 12481817 OR 12481816 OR 12481815 OR 12481666 OR 12475812 OR 12464503 OR 12464497 OR 12463314 OR 12459668 OR 12455121 OR 12454545 OR 12454520 OR 12451936 OR 12444863 OR 12444853 OR 12450939 OR 12447525 OR 12441749 OR 12439144 OR 12428488 OR 12426913 OR 12422401 OR 12412709 OR 12412699 OR 12411821 OR 12411809 OR 12410960 OR 12400738 OR 12398785 OR 12398089 OR 12394973 OR 12394972 OR 12394970 OR 12394942 OR 12394941 OR 12391520 OR 12386518 OR 12386505 OR 12386486 OR 12380166 OR 12380019 OR 12379563 OR 12377869 OR 12376340 OR 12373489 OR 12366502 OR 12354267 OR 12353924 OR 12352485 OR 12352072 OR 12352054 OR 12352050 OR 12352025 OR 12296566 OR 12271502 OR 12269239 OR 12243042 OR 12243041 OR 12235231 OR 12235111 OR 12235101 OR 12232458 OR 12231488 OR 12231483 OR 12230318 OR 12229104 OR 12227367 OR 12225610 OR 12222559 OR 12219040 OR 12218526 OR 12210714 OR 12210543 OR 12209271 OR 12205406 OR 12205405 OR 12205404 OR 12205402 OR 12205401 OR 12200529 OR 12194633 OR 12194390 OR 12193506 OR 12193118 OR 12193047 OR 12190963 OR 12185435 OR 12185428 OR 12185426 OR 12185423 OR 12182159 OR 12180587 OR 12180578 OR 12173303 OR 12170067 OR 12170036 OR 12168369 OR 12166583 OR 12165221 OR 12163812 OR 12163791 OR 12163789 OR 12161918 OR 12152667 OR 12149536 OR 12143275 OR 12139550 OR 12134647 OR 12133172 OR 12130999 OR 12130986 OR 12130960 OR 12126560 OR 12122828 OR 12122542 OR 12122520 OR 12122519 OR 12119223 OR 12113370 OR 12112560 OR 12109438 OR 12107685 OR 12107678 OR 12107675 OR 12107568 OR 12092038 OR 12090781 OR 12085618 OR 12084001 OR 12083988 OR 12082326 OR 12076220 OR 12073240 OR 12072692 OR 12072688 OR 12072679 OR 12070067 OR 12067010 OR 12063920 OR 12061198 OR 12048409 OR 12048396 OR 12046471 OR 12045628 OR 12042740 OR 12038043 OR 12034086 OR 12033093 OR 12030718 OR 12030717 OR 12030716 OR 12030713 OR 12029405 OR 12029404 OR 12029251 OR 12029250 OR 12029244 OR 12018805 OR 12016096 OR 12015642 OR 12006821 OR 12006788 OR 12006449 OR 12006416 OR 12005207 OR 12004249 OR 11999008 OR 11992649 OR 11991877 OR 11991089 OR 11989597 OR 11983671 OR 11982229 OR 11980610 OR 11978926 OR 11977488 OR 11967608 OR 11967594 OR 11967593 OR 11964585 OR 11964584 OR 11964582 OR 11956065 OR 11956053 OR 11954821 OR 11943651 OR 11940783 OR 11940761 OR 11940290 OR 11940273 OR 11940263 OR 11940260 OR 11940259 OR 11940256 OR 11939467 OR 11934725 OR 11931489 OR 11927764 OR 11926763 OR 11926761 OR 11922241 OR 11923614 OR 11918879 OR 11910735 OR 11910734 OR 11910733 OR 11910731 OR 11910728 OR 11910724 OR 11904667 OR 11904662 OR 11904656 OR 11904652 OR 11904650 OR 11904649 OR 11903141 OR 11902272 OR 11902249 OR 11902042 OR 11897644 OR 11895156 OR 11893674 OR 11891615 OR 11889327 OR 11889323 OR 11889320 OR 11889294 OR 11880300 OR 11878730 OR 11878676 OR 11878247 OR 11877560 OR 11876210 OR 11874610 OR 11874609 OR 11874607 OR 11871528 OR 11871523 OR 11871519 OR 11871082 OR 11867869 OR 11855603 OR 11855601 OR 11855249 OR 11853009 OR 11850350 OR 11850346 OR 11850339 OR 11850336 OR 11844984 OR 11841805 OR 11840279 OR 11838178 OR 11832975 OR 11826553 OR 11824274 OR 11819000 OR 11818996 OR 11818787 OR 11817489 OR 11817446 OR 11811184 OR 11811183 OR 11810129 OR 11810116 OR 11807160 OR 11802987 OR 11801842 OR 11801839 OR 11801817 OR 11797614 OR 11797031 OR 11793601 OR 11792302 OR 11790648 OR 11790214 OR 11783056 OR 11778210 OR 11778176 OR 11777361 OR 11776329 OR 11772319 OR 11770037 OR 11769497 OR 11755154 OR 11740272 OR 11740262 OR 11740259 OR 11737935 OR 11737921 OR 11737920 OR 11736679 OR 11734456 OR 11728297 OR 11726397 OR 11725920 OR 11719295 OR 11713158 OR 11713155 OR 11713144 OR 11704594 OR 11703262 OR 11703240 OR 11700418 OR 11700416 OR 11700412 OR 11699577 OR 11698327 OR 11688318 OR 11685347 OR 11685344 OR 11685343 OR 11685297 OR 11684988 OR 11684975 OR 11681284 OR 11677305 OR 11677289 OR 11673215 OR 11667968 OR 11607858 OR 11604979 OR 11597897 OR 11596168 OR 11595567 OR 11593376 OR 11591581 OR 11588485 OR 11588459 OR 11586150 OR 11575558 OR 11573656 OR 11572755 OR 11570532 OR 11562655 OR 11558966 OR 11551580 OR 11550952 OR 11549536 OR 11549535 OR 11548849 OR 11548565 OR 11546992 OR 11534576 OR 11534562 OR 11534557 OR 11531713 OR 11529218 OR 11529210 OR 11525860 OR 11520730 OR 11520709 OR 11511948 OR 11511946 OR 11511338 OR 11511336 OR 11510148 OR 11505154 OR 11505150 OR 11505131 OR 11505129 OR 11505125 OR 11502671 OR 11502280 OR 11499314 OR 11497144 OR 11497139 OR 11497137 OR 11497070 OR 11493501 OR 11493500 OR 11491505 OR 11482488 OR 11481598 OR 11480583 OR 11480394 OR 11478814 OR 11476916 OR 11476913 OR 11474627 OR 11471863 OR 11471385 OR 11469907 OR 11469893 OR 11463598 OR 11463595 OR 11463593 OR 11446752 OR 11446045 OR 11445688 OR 11439799 OR 11439576 OR 11436671 OR 11435237 OR 11435235 OR 11434447 OR 11431761 OR 11430557 OR 11430554 OR 11430549 OR 11430546 OR 11430536 OR 11430329 OR 11426130 OR 11424704 OR 11422304 OR 11414668 OR 11413895 OR 11411293 OR 11403703 OR 11403697 OR 11401900 OR 11401882 OR 11398690 OR 11398688 OR 11396301 OR 11395630 OR 11395598 OR 11395592 OR 11389362 OR 11389354 OR 11388539 OR 11387868 OR 11379547 OR 11378626 OR 11378617 OR 11378608 OR 11376534 OR 11376517 OR 11376515 OR 11374759 OR 11373510 OR 11373509 OR 11373506 OR 11373505 OR 11373501 OR 11373495 OR 11373455 OR 11373440 OR 11373433 OR 11373428 OR 11373420 OR 11371417 OR 11371416 OR 11371406 OR 11371405 OR 11371404 OR 11371383 OR 11360543 OR 11359042 OR 11355493 OR 11355136 OR 11355135 OR 11355128 OR 11355127 OR 11355126 OR 11355115 OR 11355111 OR 11353932 OR 11353930 OR 11348960 OR 11344810 OR 11339930 OR 11338241 OR 11337642 OR 11327231 OR 11327218 OR 11323351 OR 11318005 OR 11316649 OR 11316632 OR 11311992 OR 11310905 OR 11308182 OR 11308009 OR 11307873 OR 11304898 OR 11303332 OR 11299290 OR 11299066 OR 11296185 OR 11291616 OR 11288423 OR 11288218 OR 11282750 OR 11282741 OR 11280644 OR 11280643 OR 11280618 OR 11271082 OR 11271076 OR 11265020 OR 11262439 OR 10881166 OR 11255595 OR 11254541 OR 11254521 OR 11254510 OR 11252611 OR 11249254 OR 11247946 OR 11246337 OR 11246322 OR 11246299 OR 11241090 OR 11235648 OR 11235430 OR 11227309 OR 11225035 OR 11220935 OR 11224900 OR 11224886 OR 11217814 OR 11208629 OR 11208628 OR 11208613 OR 11207471 OR 11200239 OR 11195223 OR 11194810 OR 11193274 OR 11193269 OR 11192539 OR 11187209 OR 11186139 OR 11184782 OR 11179131 OR 11179128 OR 11177157 OR 11176175 OR 11176166 OR 11176161 OR 11176160 OR 11176158 OR 11176154 OR 11175550 OR 11175244 OR 11175242 OR 11175238 OR 11172686 OR 11172582 OR 11172581 OR 11172579 OR 11171733 OR 11161119 OR 11160776 OR 11157607 OR 10752864 OR 10752860 OR 10752837 OR 10752829 OR 10752813 OR 11153644 OR 11153635 OR 11153631 OR 11153623 OR 11149439 OR 11148901 OR 11139126 OR 11138876 OR 11133620 OR 11130500 OR 11129814 OR 11127486 OR 11126271 OR 11126267 OR 11126249 OR 11120895 OR 11119080 OR 11116502 OR 11112153 OR 11112102 OR 11098965 OR 11098964 OR 11098963 OR 11096025 OR 11095231 OR 11094593 OR 11094502 OR 11094500 OR 11094498 OR 11089745 OR 11086784 OR 11084887 OR 11083978 OR 11079289 OR 11076884 OR 11072555 OR 11072356 OR 11071985 OR 11069788 OR 11066190 OR 11066186 OR 11057827 OR 11057803 OR 11057797 OR 11056747 OR 11055515 OR 11048619 OR 11046222 OR 11045226 OR 11044532 OR 11038987 OR 11038110 OR 11034763 OR 11030175 OR 11030161 OR 11029345 OR 11020778 OR 11019728 OR 11019726 OR 11019725 OR 11019724 OR 11019723 OR 11019722 OR 11015106 OR 11011823 OR 11011821 OR 11009168 OR 11008997 OR 11008980 OR 11008973 OR 11007207 OR 11007206 OR 10997008 OR 10991706 OR 10991705 OR 10991704 OR 10990127 OR 10990094 OR 10988221 OR 10988205 OR 10988134 OR 10980100 OR 10980099 OR 10979804 OR 10978554 OR 10976359 OR 10969332 OR 10966303 OR 10964737 OR 10963532 OR 10963202 OR 10948686 OR 10945939 OR 10945394 OR 10945393 OR 10944426 OR 10942987 OR 10934058 OR 10934054 OR 10933148 OR 10930396 OR 10929431 OR 10926878 OR 10925563 OR 10919754 OR 10923749 OR 10923745 OR 10923744 OR 10923743 OR 10923725 OR 10923723 OR 10923722 OR 10923719 OR 10923013 OR 10922960 OR 10921619 OR 10921618 OR 10921582 OR 10921579 OR 10921578 OR 10921577 OR 10921544 OR 10920748 OR 10910492 OR 10904672 OR 10900727 OR 10897266 OR 10893752 OR 10893373 OR 10888155 OR 10882224 OR 10881862 OR 10872128 OR 10872010 OR 10864718 OR 10864215 OR 10860421 OR 10860226 OR 10858423 OR 10858404 OR 10853315 OR 10852771 OR 10850033 OR 10848682 OR 10842255 OR 10840539 OR 10834760 OR 10834758 OR 10834756 OR 10834746 OR 10834745 OR 10834744 OR 10834735 OR 10834730 OR 10834664 OR 10834555 OR 10828579 OR 10827519 OR 10826733 OR 10824405 OR 10823020 OR 10820961 OR 10814928 OR 10809455 OR 10809454 OR 10809320 OR 10809308 OR 10809283 OR 10808289 OR 10807380 OR 10806161 OR 10806160 OR 10806152 OR 10806151 OR 10806144 OR 10806143 OR 10802269 OR 10802261 OR 10802090 OR 10801164 OR 10793169 OR 10793167 OR 10793162 OR 10791521 OR 10791515 OR 10789668 OR 10789573 OR 10788976 OR 10786751 OR 10786746 OR 10786745 OR 10786432 OR 10786270 OR 10784312 OR 10782238 OR 10776429 OR 10772190 OR 10769467 OR 10764304 OR 10757569 OR 10750926 OR 10748279 OR 10745025 OR 10744307 OR 10714596 OR 10713012 OR 10713011 OR 10712982 OR 10712326 OR 10710404 OR 10709365 OR 10708215 OR 10708205 OR 10708204 OR 10708188 OR 10708187 OR 10708159 OR 10708157 OR 10708156 OR 10698395 OR 10697078 OR 10697056 OR 10696927 OR 10678651 OR 10691588 OR 10680468 OR 10673203 OR 10673182 OR 10673172 OR 10669704 OR 10668868 OR 10667529 OR 10667523 OR 10667503 OR 10666014 OR 10664950 OR 10663274 OR 10663270 OR 10657920 OR 10654518 OR 10647594 OR 10647564 OR 10638663 OR 10634340 OR 10631220 OR 10631218 OR 10626720 OR 10619833 OR 10619813 OR 10619811 OR 10619802 OR 10619798 OR 10619793 OR 10619792 OR 10617711)
